1  
2  
3  
4  
5  
6  
7  
8  
9  
10  
11  
12  
13  
14  
15  
16  
17  
18  
19  
20

## **Characterization of the interactive effects of labile and recalcitrant organic matter on microbial growth and metabolism**

Lauren N. M. Quigley<sup>1</sup>, Abigail Edwards<sup>1</sup>, Andrew D. Steen<sup>2</sup>, Alison Buchan<sup>1\*</sup>

<sup>1</sup>Department of Microbiology, University of Tennessee, Knoxville

<sup>2</sup>Department of Earth and Planetary Sciences, University of Tennessee, Knoxville

\*Corresponding author: [abuchan@utk.edu](mailto:abuchan@utk.edu)

keywords: interactive effects; terrestrially-derived, dissolved organic matter; Roseobacter; species-specificity; community interactions

Running title: Organic matter interactive effects

21

## Abstract

22 Geochemical models typically represent organic matter (OM) as consisting of multiple,  
23 independent pools of compounds, each accessed by microorganisms at different rates. However,  
24 recent findings indicate that organic compounds can interact within microbial metabolisms. The  
25 relevance of interactive effects within marine systems is debated and a mechanistic understanding  
26 of its complexities, including microbe-substrate relationships, is lacking. As a first step toward  
27 uncovering mediating processes, the interactive effects of distinct pools of OM on the growth and  
28 respiration of marine bacteria, individual strains and a simple, constructed community of  
29 *Roseobacter* lineage members were tested. Isolates were provided with natural organic matter  
30 (NOM) and different concentrations (1, 4, 40, 400  $\mu\text{M-C}$ ) and forms of labile organic matter  
31 (acetate, casamino acids, tryptone, coumarate). The microbial response to the mixed substrate  
32 regimes was assessed using viable counts and respiration in two separate experiments. Two marine  
33 bacteria and a six-member constructed community were assayed with these experiments. Both  
34 synergistic and antagonistic growth responses were evident for all strains, but all were transient.  
35 The specific substrate conditions promoting a response, and the direction of that response, varied  
36 amongst species. These findings indicate that the substrate conditions that result in OM interactive  
37 effects are both transient and species-specific and thus influenced by both the composition and  
38 metabolic potential of a microbial community.

39

40 **Introduction**

41 2.5 Tg-C of terrestrially-derived dissolved organic matter (t-DOM) flows through riverine systems  
42 annually, where the microbial community preferentially utilizes the more labile components  
43 (Vannote *et al.* 1980; Hedges, Keil and Benner 1997). This process leads to the development of an  
44 increasingly recalcitrant organic carbon pool, enriched in aromatic moieties, as headwaters move  
45 towards coastal margins (Sun *et al.* 1997; Mannino and Harvey 2000). Most chemical tracers  
46 diagnostic of t-DOM (e.g. lignin-derived phenols) are removed before reaching the open oceans  
47 (Hedges, Keil and Benner 1997; Osburn *et al.* 2016), suggesting that this material is transformed  
48 in land-sea margins. Microbial degradation clearly contributes to the disappearance of t-DOM in  
49 these dynamic aquatic systems (Ward *et al.* 2013).

50  
51 It has recently been postulated that biological interactions with different pools of organic  
52 compounds drive OM transformations in aquatic environments (Guenet *et al.* 2010; Bianchi 2011).  
53 This hypothesis has been framed within the concept of the priming effect (PE). Under the broadest  
54 definition of the term, PE occurs when the addition of a labile carbon substrate and/or nutrients  
55 alters the rate at which microorganisms degrade recalcitrant organic carbon (Kuzyakov, Friedel  
56 and Stahr 2000). These interactive effects are non-additive and can be either positive (synergistic)  
57 or negative (antagonistic). The microbial response may rely critically on the concentration and  
58 molecular composition of organic compounds, experimental timescale, nutrient status and  
59 microbial community composition (Blagodatskaya and Kuzyakov 2008; Catalán *et al.* 2015a;  
60 Steen, Quigley and Buchan 2016). PE has long been recognized as an important factor in soil  
61 organic matter turnover. However, this framework has only recently been applied to aquatic  
62 systems where its present role is enigmatic (Jenkinson, Fox and Rayner 1985; Guenet *et al.* 2010;  
63 Bianchi 2011). Bengtsson *et al.* posit the variable PE responses reported in the aquatic sciences  
64 literature suggests OM interactive effects are likely context dependent. As such, an improved  
65 mechanistic understanding of the microbial response to mixed OM pools is needed to enable  
66 predictive modeling of OM fate in various environments (Bengtsson, Attermeyer and Catalán  
67 2018).

68  
69 The salt marshes fringing the coast of the Southeastern United States, and the microbial  
70 communities residing within these systems, provide a relevant system in which to study factors

71 relevant to OM interactions and microbial processing. The rivers flowing through these marshes  
72 carry 400 to 2300  $\mu\text{M-C}$  dissolved organic carbon (DOC), approximately 75% of which is  
73 terrestrially-derived (Alberts and Takács 1999). Additionally, these salt marshes are among the  
74 most productive ecosystems on Earth, with net primary production rates ranging from 0.2 to 2.25  
75  $\text{kg C m}^{-2} \text{ yr}^{-1}$  (Wiegart and Freeman 1990; Hyndes *et al.* 2014). Within these systems, autochthonous  
76 labile inputs, from salt marsh vegetation and phytoplankton, mix with the recalcitrant t-DOM  
77 imported by riverine systems at the land-sea interface, setting the stage for OM interactions that  
78 may stimulate resident coastal microbial communities to degrade recalcitrant t-DOM. Potential for  
79 positive, albeit transient, priming of Southeastern US coastal microbial communities has been  
80 demonstrated (Steen, Quigley and Buchan 2016). However, the specific factors that control OM  
81 interactive effects at the level of individual environmentally relevant bacteria and/or communities  
82 of bacteria, have not been elucidated.

83  
84 Members of the Roseobacter clade of marine bacteria are among the most numerically abundant  
85 and active members of the coastal bacterial communities, and several representative strains have  
86 been isolated from Southeastern US estuaries (e.g. Gonzalez *et al.* 1997; González, Kiene and  
87 Moran 1999; Slightom and Buchan 2009). Success of the lineage has largely been attributed to  
88 metabolic diversity, including growth on a wide range of plant-derived aromatic compounds  
89 characteristic of t-DOM (Moran *et al.* 2007; Mou *et al.* 2008; Medeiros *et al.* 2017; Sipler *et al.*  
90 2017). Growth assays are supported by genome analyses which indicate Roseobacters often  
91 possess multiple catabolic pathways for aromatic compound degradation (Newton *et al.* 2010).  
92 Given their abundance, metabolic activity, and ability to oxidize plant-derived aromatic  
93 monomers, members of the Roseobacter clade are ideal lab cultivars to examine how  
94 representative members of the estuarine community may undergo interactive effects to degrade t-  
95 DOM.

96  
97 Here we assess the influence of labile carbon concentration and chemical identity on the growth  
98 dynamics and respiration of representative marine bacteria provided an environmentally relevant  
99 and natural source of organic matter (NOM). The NOM utilized in these experiments was derived  
100 from the Suwanee River, a Southeastern US blackwater river, and is enriched in aromatic moieties  
101 of lignin origin (Her *et al.* 2003). We used monocultures of two coastal Roseobacter species,

102 *Sagittula stellata* E-37 and *Citreicella* sp. SE45, both of which were isolated from Southeastern  
103 coastal waters and have demonstrated abilities to degrade plant-derived recalcitrant compounds  
104 (Gonzalez *et al.* 1997; Frank 2016; Chua 2018). We constructed community of six coastal bacteria  
105 that included these two strains community as well as four other *Roseobacter* strains selected based  
106 on the number (1-6) and types of aromatic carbon catabolism pathways present in their genomes  
107 (Table 1). In this study, 16 labile organic matter (LOM) conditions were tested in a fully factorial  
108 experiment. Four substrates, ranging from simple to chemically complex (sodium acetate,  
109 coumarate, casamino acids + tryptophan, and tryptone, in order of increasing chemical complexity)  
110 at four concentrations (1, 4, 40, and 400  $\mu\text{M-C}$ ; Table 2) were provided as growth substrates for  
111 monocultures of *S. stellata* and *Citreicella* sp. SE45 and the six-member constructed community.  
112 Sources of LOM were chosen to represent a gradient of chemical complexities that are  
113 differentially processed by microbes: sodium acetate and casamino acids + tryptophan are likely  
114 shunted directly into central metabolism; tryptone is a mixture of oligo-peptides, many of which  
115 require initial extracellular enzymatic breakdown before products are transported across the cell  
116 membrane and enter central metabolism; and coumarate, an aromatic monomer derived from lignin  
117 (Hedges *et al.* 1988). Cleavage of the aromatic ring requires specific pathways that are found in a  
118 limited number of microbes and are most often subject to catabolite repression (Dal, Steiner and  
119 Gerischer 2002; Mazzoli *et al.* 2007). Of the six bacterial isolates tested, only *S. stellata* and  
120 *Citreicella* sp. SE45 possess the ability use coumarate as a sole carbon source.

121

122

## Materials and Methods

123 **Strains, media and growth conditions.** *Sagittula stellata* sp. E-37, *Citreicella* sp. SE45,  
124 *Phaeobacter* sp. Y4I, *Roseovarius nubinhibens* ISM, *Sulfitobacter* sp. EE-36, and *Sulfitobacter*  
125 sp. NAS-14.1 were routinely grown on an aromatic basal medium (ABM) containing per liter 8.7  
126  $\mu\text{M}$  KCl, 8.7  $\mu\text{M}$  CaCl<sub>2</sub>, 43.5  $\mu\text{M}$  MgSO<sub>4</sub>, and 174  $\mu\text{M}$  NaCl with 225 nM K<sub>2</sub>HPO<sub>4</sub>, 13.35  $\mu\text{M}$   
127 NH<sub>4</sub>Cl, 71 mM Tris-HCl (pH 7.5), 68  $\mu\text{M}$  Fe-EDTA, trace metals (7.8492 mM Nitroloacetic acid  
128 , 0.5325 mM MnSO<sub>4</sub>\*H<sub>2</sub>O, 0.4203 mM CoCl<sub>2</sub>\*6H<sub>2</sub>O, 0.3478 mM ZnSO<sub>4</sub>\*7H<sub>2</sub>O, 0.0376 mM  
129 CuSO<sub>4</sub>, 0.1052 mM NiCl<sub>2</sub>\*6H<sub>2</sub>O, 1.1565 mM Na<sub>2</sub>SeO<sub>3</sub>, 0.4134 mM Na<sub>2</sub>MoO<sub>4</sub>\*2H<sub>2</sub>O, 0.3259 mM  
130 Na<sub>2</sub>WO<sub>4</sub>\*2H<sub>2</sub>O, 0.2463 mM Na<sub>2</sub>SiO<sub>3</sub>\*9H<sub>2</sub>O) and trace vitamins (0.0020% vitamin H [Biotin]),  
131 0.0020% folic acid, 0.0100% pyridoxine-HCl (B6), 0.0050% riboflavin (B2), 0.0050% thimaine

132 (B1), 0.0050% nicotinic acid, 0.0050% pantothenic acid (B5), 0.0001% cyanocobalamin  
133 (B12), 0.0050% *p*-aminobenzoic acid). These strains were routinely passaged on ABM containing  
134 10 mM sodium acetate. Four of these strains (E-37, SE45, Y4I, and EE-36) were isolated from  
135 Southeastern US coastal waters, while NAS-14.1 was isolated from North Atlantic off-shore  
136 waters and ISM from the Caribbean Sea (Buchan *et al.* 2000; Cude *et al.* 2012). The bacteria were  
137 routinely cultured at 30°C, shaking, in the dark. This temperature condition is nominally  
138 representative of Southeastern US salt marshes which are tidally influenced and where average  
139 water temperatures are close to 30°C from June through September (The Southeast Regional  
140 Climate Center, University of North Carolina, Chapel Hill, NC). Suwannee River natural organic  
141 matter (NOM), obtained from the International Humic Substance Society (IHSS, St. Paul, MN)  
142 was used as a representative t-DOM. This material is a discipline standard for natural organic  
143 matter (Her *et al.* 2003). Incubations occurred in the dark as the aromatic moieties in NOM are  
144 sensitive to photodegradation. NOM is provided in lyophilized form from IHSS and was  
145 suspended in Milli-Q water and 0.22  $\mu$ m filter-sterilized prior to addition to the medium. NOM  
146 was held at a constant concentration of 2 mM-C for all experiments. <sup>13</sup>C NMR estimates of carbon  
147 distribution provided by IHSS show that Suwannee NOM comprised of roughly 25% aromatic  
148 residues.

149  
150 Four different forms of labile organic matter (LOM) (sodium acetate, casamino acids + tryptophan,  
151 coumarate, and tryptone) were added at four concentrations (400, 40, 4, and 1  $\mu$ M-C) using ABM  
152 as the base medium. Cultures were grown for 14 days in the dark at 30°C, with shaking. Substrate  
153 concentrations were selected after a preliminary experimentation using a LOM concentration  
154 gradient of 400  $\mu$ M-C to 20 nM-C. All glassware used was combusted at 450° C for at least four  
155 hours to remove trace organic carbon. All experiments utilized cultures preconditioned on 2 mM-  
156 C *p*-hydroxybenzoic acid to match the carbon concentration of the Suwannee River NOM utilized  
157 in the mesocosms. The growth rates of all strains on this substrate at this concentration are  
158 comparable and mid-exponential phase cultures were used as inoculum at volumes of 10 – 100  $\mu$ l.  
159 As cells were not washed prior to transfer to fresh media, there may have been some modest  
160 carryover of *p*-hydroxybenzoate (< 2 $\mu$ M). Nonetheless, carryover would have been consistent  
161 across treatments for a given strain or the six-member community and comparisons were always  
162 made to composite data (NOM plus LOM alone controls) which would have the same amount of

163 carryover. Viable cell density experiments were carried out in volumes of 10 mL while  
164 respirometer incubations were in 125 mL volumes.

165  
166 ***Experimental treatments.*** All experiments assessed interactive effects of organic matter by  
167 comparing viable cell density or respiration in a treatment containing both labile and recalcitrant  
168 organic matter to the sum of growth or respiration in treatments containing only one of those  
169 carbon sources. There were a total of four treatments: NoC (no carbon addition control), LOM  
170 (labile organic matter alone), NOM (Suwannee River natural organic matter alone), and “mix”  
171 (LOM + NOM treatments) (Table 2). The NoC controls lacked both LOM and NOM, serving as a  
172 control for bacterial growth on medium components. The LOM treatment consisted of LOM under  
173 the same conditions as the corresponding mix treatment. The NOM treatment contained 2 mM-C  
174 Suwannee River NOM as the sole carbon source. The mix treatment had both 2 mM-C NOM and  
175 one of four concentrations of the different LOMs. Composite was calculated by adding the  
176 response of LOM alone and NOM alone. The microbial seeding density for all experiments was ~  
177  $1 \times 10^4$  cells mL<sup>-1</sup>, cell densities are reported in figures and tables. For the constructed community  
178 inoculum, equal representation of each strain was targeted.

179  
180 For each treatment, viable cell abundance and community composition were measured. As we  
181 were motivated to understand the ability of different OM mixtures to support the growth of marine  
182 bacteria, viable counts were monitored rather than direct microscopic counts or DNA-based  
183 approaches, which generally do not readily distinguish between living and dead cells. Viable  
184 counts have the additional advantage over direct counts that it is easy to distinguish between  
185 individual *Roseobacter* strains (see below). Viable counts were obtained by serial dilution in  
186 ABM. Dilutions were plated on YTSS agar, a complex medium (per liter: 5 g yeast extract, 2.5 g  
187 tryptone and 15 g sea salts) and incubated in the dark at 30°C. Single strain plates were incubated  
188 for two days, while constructed community plates were incubated for four days in order to allow  
189 the development of identifying pigment. Plates with 30-300 colonies were counted. Cultures were  
190 spot-checked for cell clumping by microscopy and none was evident (Fig. S1).

191  
192 Due to the impracticality of obtaining all of the necessary samples from a single set of experimental  
193 samples, two parallel sets of the same experiment were performed. A set of incubations for viable

194 counts was first performed and the results from those incubations were used to inform the  
195 conditions selected for incubation in a respirometer. For the cell abundance and community  
196 composition experiment, culture aliquots were collected on days 0, 1, 2, 4, 7, 10 and 14.  
197 Community composition was determined by colony morphology, as each strain of *Roseobacter* in  
198 the community had a unique, readily identifiable, colony morphology (Fig. S2). Respiration was  
199 monitored in a separate set of microcosms using a Micro-Oxymax respirometer (Columbus  
200 Instruments, Columbus, OH), in which cumulative CO<sub>2</sub> production was measured by infrared  
201 absorbance continuously throughout a shorter (7 day) incubation period.

202

203 **Data Analysis.** To assess interactive effects of mixed substrate treatments, the sum of the viable  
204 cell density or CO<sub>2</sub> production in the LOM and NOM treatments was calculated and termed  
205 “composite”, which represents the case in which growth on LOM and NOM are independent. The  
206 timing, extent and nature (synergistic or antagonistic) of interactive responses was determined  
207 through comparison of the resulting composite data and that from the mixed substrate treatments.

208

209 All data analysis was performed using the R statistical platform and visualized using the ggplot2  
210 package (Wickham 2009; R Core team 2015). Raw data and scripts are posted at  
211 [http://github.com/lnmquigley/roseo\\_priming\\_2018](http://github.com/lnmquigley/roseo_priming_2018). Cell densities were log-transformed and sub-  
212 setted by day. For each day, a three-way ANOVA was performed to determine whether differences  
213 in cell densities were being driven by treatment, concentration or source of LOM. Because the  
214 experimental design was unbalanced, two three-way ANOVAs were performed on the final time  
215 point in the respirometer incubations in order to determine the factors influencing CO<sub>2</sub>  
216 accumulation. Additionally, rates were calculated during exponential CO<sub>2</sub> production, and three-  
217 way ANOVAs were employed to identify factors influencing the rate of CO<sub>2</sub> production. For all  
218 ANOVAs, Fisher’s least significant difference was used as a post hoc test and *p*-values were  
219 adjusted to correct for the false discovery rate using the Benjamini-Hochberg correction  
220 (Benjamini and Hochberg 1995).

221

222 Community composition was determined by visually identifying constructed community members  
223 based on their distinct colony morphologies (Fig. S2). In order to calculate  $\alpha$  diversity in the  
224 constructed community experiments, Shannon entropy was calculated for each culture, which was



225 then exponentially transformed into Hill numbers, also known as effective species number (Jost  
226 2007). A three-way ANOVA was performed to determine the relationship between effective  
227 species number and treatment, concentration and source of LOM. The  $p$ -values obtained from the  
228 Fisher's least significant difference were adjusted using the Benjamini-Hochberg correction to  
229 account for multiple comparisons. A Bray-Curtis dissimilarity matrix was calculated using all  
230 constructed community cultures for each day. In order to determine sources of variation  
231 (treatment, concentration, and/or source of LOM) within the Bray-Curtis dissimilarity matrix, a  
232 permutational MANOVA was employed using the Adonis function in the R package vegan  
233 (Oksanen *et al.* 2017).

## 234 **Results**

### 235 *Substrate preferences vary between individual strains*

236 To assess the extent to which each LOM type and concentration could support the growth of the  
237 tested coastal marine bacteria, we monitored viable counts of monocultures of E-37 and SE45 as  
238 a function of organic matter treatment. Viable cell abundances for SE45 and E-37 increased two  
239 to three orders of magnitude within the first 24 hours of incubation, depending on the concentration  
240 of LOM provided (Fig. 1). In both strains, LOM type and concentration interacted significantly to  
241 drive cell densities at each time point (three-way ANOVA,  $n=5$ ,  $p<0.001$ , Tables S1 and S2), with  
242 the single exception of E-37 on Day 14 (Table S2). For all four LOM types, the two lowest  
243 concentrations of LOM (1 and 4  $\mu\text{M}$ ) did not support reliable growth, relative to No C added  
244 controls, of either of the two monocultures over the course of the experiment (Fig. 1). With the  
245 exception of E-37 provided 40  $\mu\text{M}$  tryptone, neither of the two bacterial isolates showed  
246 consistently robust growth at 40  $\mu\text{M}$  with the remaining LOM substrates (Fig. 1). For all LOM  
247 types, the highest concentration of labile carbon (400  $\mu\text{M}$ ) showed significantly enhanced growth  
248 of both the strains (7-15 times greater than No C). A general trend emerged for all cultures in  
249 which cell viability increased rapidly at the start of the experiment and was followed by a decline  
250 beginning at Day 4 or later. SE45 saw declines ranging from 73-85% of viable cells in all of the  
251 400  $\mu\text{M}$  LOM alone treatments. However, viable cells remained significantly (at least 3-fold)  
252 higher than No C controls throughout the course of the experiment (Fig. 1). In contrast, E-37  
253 demonstrated a more rapid decline in viability. By the end of the 14-day incubation period, strain  
254 E-37 had  $< 1\%$  of maximum viable cells remaining in the LOM alone treatments provided 400  
255  $\mu\text{M}$ -C acetate, casamino acids and coumarate. Furthermore, viable counts in those cultures were

256 indistinguishable from No C controls by Day 10 or earlier. Viable count data indicate that both  
257 monocultures and the community are able to use a small fraction of NOM-derived carbon in the  
258 absence of any LOM (Fig. 1).

259  
260 Each strain demonstrated unique and apparent preferences for the four different LOM types. Given  
261 the boom and bust growth dynamics described above, we focused on maximal viable counts within  
262 the first 48 hrs of the experiment for all LOM types provided at the highest concentration (400  
263  $\mu\text{M}$ ). E-37 reached the highest cell densities on coumarate, nearly ten-fold higher viable counts  
264 compared to No C controls ( $2.3 \times 10^7 \pm 6.28 \times 10^6$  vs  $2.86 \times 10^6 \pm 9.34 \times 10^5$  CFU/mL) and lowest on  
265 acetate ( $5.18 \times 10^6 \pm 1.58 \times 10^6$  CFU/mL). E-37 grew equally well on casamino acids and tryptone.  
266 SE45 growth was equivalent on all substrates except casamino acids, for which its viable counts  
267 were ~50% of those grown on the other three substrates within the first few days of the experiment  
268 (Fig. 1).

#### 269 *Individual strains show differential responses to mixed organic matter treatments*

270 For the mixed substrate experiments, NOM was held at a constant concentration of 2 mM-C,  
271 consistent with OC concentrations in Georgia coastal estuaries (Alberts and Takács 1999). To  
272 assess interactive growth responses, mixed substrate treatments (mix), which included a source of  
273 LOM and NOM in the same treatment, were compared to a composite class of data: the additive  
274 response of the LOM alone and NOM alone treatments. This allowed us to assess synergistic or  
275 antagonistic interactions of LOM and NOM on bacterial growth in the mixed treatments.

276  
277 The individual strains displayed differing response to the various treatments. SE45 reached the  
278 highest viable cell densities in the mix treatments (LOM + NOM) with the highest LOM  
279 concentrations (400  $\mu\text{M}$ -C; Fig. 1). Final viable cell densities increased with increasing LOM  
280 concentrations. While E-37 viable cell densities generally tracked with LOM concentrations, the  
281 differences in maximum cell densities across LOM type and concentration were less than an order  
282 of magnitude, compared to on average 10-fold difference in SE45 treatments between 400  $\mu\text{M}$ -C  
283 and the lower concentrations.

284

285 While both strains displayed a significant growth response to the majority ( $\geq 75\%$ ) of mixed-  
286 substrate treatments, the effect was always transient (Fig. 1, Table 3). Both synergistic (positive)  
287 and antagonistic (negative) responses were observed, and the responses were species-specific. A  
288 significant synergistic response was seen for SE45 on all four LOM substrates at the highest  
289 concentration (400  $\mu\text{M-C}$ ). However, this was displayed at different time points for the different  
290 LOMs (Fig. S3, Table 3). Conversely, antagonistic interactions (i.e., composite cell densities  
291 significantly higher than those in mixtures) were observed for all LOM types at 4  $\mu\text{M-C}$  (Fig. S3,  
292 Table 3) with this strain. Inconsistent trends were observed in other LOM concentration treatments.  
293 E-37 also displayed a significant response to all four LOM substrates at the highest concentrations,  
294 but the effect was negative on one substrate: tryptone (Fig. S3, Table 3). Growth of E-37 was  
295 negatively influenced at some point during the experiment for all concentrations of tryptone,  
296 except the lowest (1  $\mu\text{M-C}$ ). While a synergistic response was observed with coumarate at the  
297 highest concentration, antagonistic responses were observed with this substrate at the three lower  
298 concentrations. When E-37 displayed a significant growth response on casamino acids, it was  
299 always synergistic.

300  
301 Due to the differential growth responses of the two strains to different concentrations of casamino  
302 acids, additional experiments were performed to monitor respiration at all concentrations of this  
303 LOM. Respiration assays were also performed on cultures provided acetate and coumarate at the  
304 highest LOM concentration (400  $\mu\text{M-C}$ ) to provide comparative information on the influence of  
305 different chemical compositions of LOM to microbial metabolism. These assays were run for  
306 seven days as the majority of culture growth from the previous experiment occurred within the  
307 first few days of incubation (Fig. 1). As a result of automated sampling, the respiration data  
308 provided higher temporal resolution. However, due to the sensitive nature of the probes it was  
309 neither possible to agitate the culture vessels nor take samples for viable counts throughout the  
310 course of the incubation, as was done for the previously described experiment. Instead, viable  
311 counts were performed for the seeding inoculums and each vessel at the final (Day 7) time points  
312 (Table S3). These values likely do not reflect the maximum viability of these cultures which is  
313 anticipated to have occurred earlier in the experiment, consistent with what was observed for the  
314 first experiment (see Fig. 1). Indeed, it is likely that by Day 7, cultures would be experiencing a  
315 decline in cell viability for several of the treatments.

316  
317 The response by SE45 to mixed conditions when measured via respiration matched the results  
318 found in the initial experiment for 1, 4, and 400  $\mu\text{M-C}$  casamino acids (Fig. 2). However, mixed  
319 and composite  $\text{CO}_2$  production were statistically indistinguishable from each other with cultures  
320 provided 400  $\mu\text{M-C}$  coumarate and 40  $\mu\text{M-C}$  casamino acids (Fig. 2, Table 5), despite the fact that  
321 these treatments exhibited significant synergistic and antagonistic responses, respectively, when  
322 assayed by viable count during the initial experiment (Fig. 1).  $\text{CO}_2$  production in NOM alone  
323 treatments was statistically indistinguishable from mixed OM treatments when SE45 was provided  
324 low concentrations of casamino acids as well as the highest (1, 4, and 400  $\mu\text{M}$ ; Student's t-test  $p$   
325  $> 0.05$ ). However,  $\text{CO}_2$  production on NOM was significantly lower than the mixed treatments at  
326 40  $\mu\text{M-C}$  casamino acids (Student's t-test  $p < 0.05$ ) and acetate and coumarate at 400  $\mu\text{M-C}$   
327 (Student's t-test  $p < 0.05$ ). At low concentrations of casamino acids, the mixed and composite  
328 treatments of E-37 were statistically indistinguishable according to the ANOVA model used  
329 (Table 5). The low concentration mixed treatments for E-37 all had significantly higher rates of  
330  $\text{CO}_2$  production ( $\sim 2$ -10 fold) than their corresponding LOM alone treatments (Tables S5-7). E-37  
331 produced a synergistic response when stimulated with 400  $\mu\text{M-C}$  acetate, casamino acids and  
332 coumarate, yielding cumulative  $\text{CO}_2$  production values that were 2- to 5-fold higher than the  
333 corresponding composite data (the sum of the NoC and LOM alone treatments) and rates that were  
334 3- to 10- fold higher than the corresponding LOM alone data. (Fig. 2B, Tables 5, S5-7).

335  
336 *Constructed community displays similar dynamics to single strains under mixed OM conditions*  
337 Given the differential response of individual strains to homogenous and mixed substrate  
338 conditions, we next tested a six-member constructed community, which included both strains, to  
339 assess interactive effects amongst community members with different metabolic capabilities.  
340 Similar to the single strain experiments, concentration and source of the LOM addition interacted  
341 significantly to determine viable cell densities at each time point in the 14-day experiment (Fig 1,  
342 Table S8). For each source of LOM, the viable cell densities produced at 400  $\mu\text{M-C}$  were  
343 significantly greater than those at lower LOM concentrations (three-way ANOVA,  $n=5$ ,  $p<0.001$   
344 for all time points). For mixed NOM + LOM substrate experiments, the community demonstrated  
345 a synergistic growth response, for at least one time point, to all LOM sources at 400  $\mu\text{M-C}$ , and  
346 tryptone at 40  $\mu\text{M-C}$  and 4  $\mu\text{M-C}$  (Fig. S4, Table 4). Though in some treatments (e.g., 4  $\mu\text{M-C}$

347 tryptone and acetate and 400  $\mu\text{M-C}$  casamino acids) this was preceded by an initial antagonistic  
348 interactive response. Relative to the 400  $\mu\text{M}$  concentrations, the community displayed a significant  
349 reduction in viable counts when supplied with each LOM source at 1  $\mu\text{M-C}$ ; the intervening  
350 concentrations showed varying responses. The six-member constructed community was best able  
351 to utilize tryptone for growth; the three other LOM types reached cell densities  $\sim 25\%$  of tryptone-  
352 fed cultures (Fig. 1). By Day 14, communities showed  $\sim 60\%$  decline in maximum viable cells on  
353 all of the substrates at 400  $\mu\text{M}$ , except coumarate, for which there was 90% mortality (Fig 1).

354  
355 No synergistic responses were observed in the constructed community when respiration was used  
356 as the measure of microbial activity. However, significant antagonistic responses were observed  
357 in the 40  $\mu\text{M-C}$  casamino acids treatment (Table 5), as well as significantly lower  $\text{CO}_2$  production  
358 rates (1.5-fold) compared to the LOM treatment (three-way ANOVA,  $n=3$ ,  $p<0.001$ , Tables S5-  
359 7), corroborating some of the antagonistic results from the viable count-based approach used in  
360 the first experiment (see Figs. 1 and 4).  $\text{CO}_2$  production rates were 1.3 and 1.5-fold higher in the  
361 mixed treatments than the LOM alone treatments for the low concentrations (1 and 4  $\mu\text{M-C}$ ) of  
362 casamino acids treatments (three-way ANOVA,  $n=3$ ,  $p<0.001$ ) and were statistically  
363 indistinguishable at the highest LOM concentrations (Tables S5-7).

364  
365 *LOM type drives microbial community composition*

366 We next assessed the influence of concentration and source of LOM on community composition  
367 in the six-member culture. Species diversity decreased with increasing LOM concentration in both  
368 single and mixed OM substrate treatments (Fig. S5). At the highest LOM concentration,  
369 mesocosms were dominated by a single strain: either SE45 on coumarate or Y4I on the other three  
370 LOM types (Fig. 3). Treatment (mix or composite), LOM concentration, and LOM source  
371 interacted significantly to influence species diversity for all time points, with the exception of Day  
372 2 where only LOM concentration and source interacted significantly (three-way ANOVA,  $n=5$ ,  
373  $p<0.002$  for all time points) (Table S9). LOM concentration, LOM source, and treatment  
374 interacted significantly to drive differences between communities throughout the course of the  
375 incubation (permutational MANOVA,  $p<0.05$ ). Treatments using coumarate as LOM source  
376 resulted in a community distinct from the other sources of LOM at 400  $\mu\text{M-C}$  (Fig. 3). Coumarate  
377 communities were characterized by increased abundances of SE45, comprising up to 84-90% of

378 the community, compared to the other sources of LOM, where communities were dominated by  
379 strain Y4I (up to 85-98% of the community) (Fig. 3). Mixed LOM + NOM treatments had  
380 increased viable cell abundances for E-37 and SE45 compared to LOM alone treatments and both  
381 of these strains have increased viable cell densities in the NOM alone treatments compared to No  
382 C (Figs. 1 and 3). The community composition within the respirometer experiments generally  
383 mirrored that of the viable counts experiment in which Y4I was the most abundant member of the  
384 community for all sources of LOM, with the exception of the coumarate treatments (Fig. S6). The  
385 most notable difference between the community composition in the viable count vs respirometer  
386 experiments is that Y4I maintained higher relative abundances at lower concentrations of LOM  
387 than in the viable counts (Fig. S6).

388

389

### Discussion

390 Traditionally, geochemical models designate organic matter as consisting of multiple, independent  
391 pools of compounds, each of which is degraded by microorganisms at different rates (Arndt *et al.*  
392 2013; Hansell 2013). However, recent findings in microbial physiology suggest that organic  
393 compounds can interact within microbial metabolisms in unpredictable ways (Gulvik and Buchan  
394 2013; Gontikaki *et al.* 2015; Ward *et al.* 2016). The degree to which OM interactivity in general,  
395 and the priming effect (PE) specifically, are quantitatively important in aquatic ecosystems is an  
396 area of current study and debate. Field and lab studies have shown that, depending on the precise  
397 circumstance, labile organic matter can speed, slow, or have no effect on the oxidation of  
398 recalcitrant organic matter in aquatic environments (e.g., Bengtsson *et al.* 2014; Gontikaki *et al.*  
399 2013; Bianchi *et al.* 2015; Catalán *et al.* 2015; Steen, Quigley and Buchan 2016). Given these  
400 inconsistencies in the literature, we set out to perform controlled laboratory experiments to  
401 characterize interactive effects of distinct OM pools on microbial metabolism.

402

403 Coastal salt marsh microbial communities are subject to periodic pulses of OM from multiple  
404 sources and are inherently complex (e.g. Moran *et al.* 2007; Medeiros *et al.* 2017). Thus, the use  
405 of environmentally relevant and culturable representatives from these communities provides a  
406 tractable system for obtaining foundational knowledge of the underlying mechanisms of  
407 interactive effects on microbial processing of OM. Here, we used cultured representatives from a  
408 lineage of coastal marine bacteria that are known to dominate and be metabolically active in coastal

409 estuaries (Buchan, González and Moran 2005; Bakenhus *et al.* 2017). These bacteria were  
410 provided a natural and environmentally relevant source of recalcitrant organic matter, natural  
411 organic matter (NOM) derived from a river feeding Southeastern US coastal estuaries. We  
412 assessed the microbial metabolic response to mixtures of labile and recalcitrant OM in two ways:  
413 by measuring viable cell abundance and by measuring CO<sub>2</sub> production. These experiments  
414 revealed the importance of labile substrate concentration and chemical composition in dictating  
415 the growth dynamics of representative marine bacteria in the presence of natural organic matter.  
416 We quantified species-specific responses to mixed substrate regimes, documented the transient  
417 nature of these responses and demonstrated microbial community composition shifts in response  
418 to interactive effects in relevant mixed carbon conditions.

419

#### 420 *Interactive OM effects are often transient*

421 Our data with cultured bacteria demonstrate evidence of the transience of interactivity in OM  
422 degradation. These interactivities occurred on timeframes consistent with what has been reported  
423 previously in the PE literature for both individual microbial isolates and communities (1-7 days  
424 e.g., D'Errico *et al.* 2013; Bianchi *et al.* 2015; Steen, Quigley and Buchan 2016). Synergistic  
425 interactive effects of the labile and recalcitrant C sources on microbial growth were detectable  
426 either within the first few days of our incubations and/or as the microbial populations started to  
427 decline towards the end of the 14-day experimental period. With few exceptions, when synergistic  
428 interactions occurred, they did not persist beyond a two to four-day timeframe. With some  
429 treatments, an additional, temporally distinct and positive synergistic interaction was observed 10-  
430 14 days into the experiment. Antagonistic interactive effects were also observed: for SE45 in half  
431 of the treatments conditions and ~40% of the treatments for E-37 and the constructed community.  
432 These treatments were almost always at the lower concentrations of LOM, with the exception of  
433 E-37 when provided 400  $\mu\text{M-C}$ . While most of the antagonistic effects are transient, SE45  
434 produces long-lasting antagonistic responses when provided NOM with 4  $\mu\text{M-C}$  casamino acids  
435 and coumarate. E-37 demonstrated antagonistic effects lasting almost the entirety of the incubation  
436 when provided NOM along with 4  $\mu\text{M-C}$  coumarate, and 4 or 400  $\mu\text{M-C}$  tryptone. The constructed  
437 community displayed long antagonistic effects when provided 1  $\mu\text{M-C}$  casamino acids, coumarate,  
438 and tryptone. Mix conditions containing acetate did not elicit long-lasting antagonistic  
439 effects. Instead, acetate appears to stimulate synergistic effects of the greatest duration in each

440 inocula. This may indicate that, for Roseobacters, chemically simple labile substrates that feed  
441 directly into central metabolism are more likely to stimulate a synergistic effect at high  
442 concentrations, while more complex labile substrates may result in an antagonistic response at low  
443 concentrations.

444  
445 While viable cell densities in treatments with NOM alone stayed relatively consistent throughout  
446 the incubation, most of the LOM only treatments exhibited severe declines in viable cell densities  
447 following an initial increase in cell growth. Those declines drove down the composite values used  
448 for comparisons with mix treatments to quantitatively assess interactive effects. The degree of  
449 viable cell demise tended to increase with increasing substrate concentration. Given the time  
450 scales of the experiments performed here, it is unlikely that substantial numbers of cells died as a  
451 result of lack of organic carbon or nutrients (Novitsky and Morita 1978). Furthermore, the medium  
452 was well-buffered to prevent dramatic changes in pH. However, it is plausible that the catabolism  
453 of a given LOM and/or NOM results in the production of toxic metabolic by-product, giving rise  
454 to decreased viability. It has been previously shown that microbial conversion of simple carbon  
455 substrates can result in the production and release of a diversity of compounds (Lechtenfeld *et al.*  
456 2015). Alternatively, prophage induction could have contributed to mortality. Three of the six  
457 strains, E-37, SE45, and Y4I, are predicated to encode prophage (Table 2), though to our  
458 knowledge induction of these prophages has not yet been demonstrated for any of these putative  
459 lysogens. Nonetheless, recent evidence suggests a correlation between bacterial productivity and  
460 lysogenic to lytic conversion in natural systems (Brum *et al.* 2016). Indeed, these two ideas are not  
461 mutually exclusive as increased bacterial metabolism could lead to enhanced production of toxic  
462 metabolic by-products that could, in turn, induce a global stress response in bacterial strains,  
463 initiating a lysogenic-lytic conversion (Feiner *et al.* 2015). Finally, growth substrate has been  
464 shown to influence prophage induction, indicating host metabolic state can have a direct influence  
465 on the lysogenic-lytic decision (e.g. Howes 1965; Czyz *et al.* 2001).

466  
467 Viable cell densities did not decline in the mixed treatments as precipitously as those in the LOM  
468 alone treatments. The apparent stabilizing effect seen in the mixed OM treatments compared to the  
469 composites may arise from the ability of the bacteria to access additional components of NOM,  
470 enabled by LOM catabolism, a mechanism posited by Guenet and colleagues (2010). Furthermore,



471 in some instances, the cell densities in the mixed treatments begin to rebound towards the later  
472 stages of the experiment. The mixed carbon regime provided by the combination of LOM and  
473 NOM may yield conditions favorable for microbial adaptations, such as the proliferation of growth  
474 advantage in stationary phase (GASP) mutants (Zinser and Kolter 1999), which could utilize  
475 previously unavailable components of the NOM, or possibly tolerate toxic compounds released by  
476 actively growing cells earlier in the incubation. Additional experiments are needed to specifically  
477 address the contribution of microbial adaptation, acclimation, prophage induction and metabolite  
478 toxicity to the observed trends.

479  
480 Some inconsistencies between interactive effects in the viable counts and respiration data were  
481 observed and not completely unexpected. These discrepancies may indicate altered growth  
482 efficiencies under different substrate regimes. Alternatively, cultures had to remain static in the  
483 respirometer and it is plausible that biofilms developed under these conditions, though they were  
484 not visible to the naked eye. Roseobacters are prolific in natural marine biofilms (Dang and Lovell  
485 2000; Dang *et al.* 2008) and all six of these strains have been previously demonstrated to form  
486 biofilms when grown on complex media (Slightom & Buchan, 2009). The physiological status of  
487 bacteria growing in biofilms is different from those grown planktonically due to alterations in gene  
488 expression that can lead to changes in cell surface chemistry, physiology and behavior (Costerton  
489 *et al.* 1995). Thus, surface associated growth could influence microbial catabolism under mixed  
490 substrate regimes. Additional studies are needed to tease apart the contributions of these factors  
491 and we caution against making direct comparisons between the experiments that relied on viable  
492 counts (shown in Figs 1 & 3) and those that monitored respiration (shown in Figs 2 & 4).

493  
494 *Interactive effects are species-specific*

495 While there is overlap between the mixed carbon substrate conditions that stimulate or repress  
496 growth of SE45, E-37 and the constructed community, each inoculum experienced OM  
497 interactivity under a unique set of conditions. For example, SE45 demonstrated a synergistic  
498 response to mixtures of NOM with 400  $\mu\text{M-C}$  tryptone, a treatment in which E-37 responded  
499 antagonistically. The differential ability of SE45 and E-37 to undergo synergistic interactive  
500 effects through the addition of tryptone suggests that the expression and/or activity of extracellular  
501 enzymes could be an important factor in the onset of interactive effects. While monocultures of E-

502 37 ultimately reach similar viable cell densities as all other members of the community, E-37  
503 displays a considerably longer lag phase relative to the other strains when grown on 2 mM-C  
504 tryptone as a monoculture (Fig. S7). The delayed growth on tryptone may prevent E-37 from  
505 exhibiting a synergistic response with tryptone plus NOM when grown by itself. However, E-37  
506 outperforms SE45 in the constructed community when provided low concentration of tryptone,  
507 which as discussed below, is indicative of synergistic interactions between community members.  
508 Both E-37 and SE45 undergo a synergistic interactive effect in the 40  $\mu$ M-C acetate mixed  
509 treatment. However, the community undergoes an antagonistic interactive effect under the same  
510 conditions. It is plausible that competition with Y4I, the overwhelming dominant member of the  
511 community at high LOM concentrations of tryptone, casamino acids and acetate, contributes to the  
512 antagonistic effect seen in the constructed community treatments by preventing either E-37 or  
513 SE45 from performing necessary metabolic processes required for a synergistic response.

514  
515 In agreement with our earlier report that a natural estuarine microbial community underwent a  
516 significant positive interactive effect with the addition of a globular protein (bovine serum  
517 albumin, provided at 500  $\mu$ M) (Steen, Quigley and Buchan 2016), the constructed community  
518 analyzed in this study displayed synergistic interactive effect in the presence of tryptone, an  
519 assortment of peptides, at 400  $\mu$ M. However, timing of a response differed: it was delayed in the  
520 the constructed community with tryptone (occurring during the second week of incubation)  
521 compared to an immediate priming response by the natural community provided complex protein.  
522 While there are many factors that could contribute to this apparent temporal disconnect, the  
523 relatively low strain diversity of the constructed community may be a key driver. By day 1, the  
524 constructed community was dominated by a single strain: Y4I comprised 98% of the community  
525 in this treatment. Y4I belongs to the genus *Phaeobacter*, members of which were recently shown  
526 to bloom in the presence of Arctic riverine, dissolved organic matter (Sipler *et al.* 2017).  
527 Additionally, we earlier observed that acetate (at 500  $\mu$ M-C) repressed the ability of a estuarine  
528 microbial community to degrade phytoplankton necromass (Steen, Quigley and Buchan 2016).  
529 However, in the current experiments all bacterial inocula demonstrated a synergistic growth  
530 response to the addition of acetate, at the highest concentration (400  $\mu$ M-C). Collectively, these  
531 findings demonstrate that the substrate conditions that result in OM interactive effects are species-  
532 specific and thus dictated by the composition and metabolic potential of a community.

533

534 *Carbon sources shape the composition and diversity of the constructed community*

535 While scant information exists on how interactive effects influence community composition,  
536 studies that indicate riverine DOM structures the composition of microbial communities along the  
537 river-estuary continuum provide a useful comparative framework (Langenheder *et al.* 2004;  
538 Blanchet *et al.* 2017). One report using an estuarine community incubated with riverine DOM and  
539 casamino acids saw no evidence for interactive effects and only minor alterations in microbial  
540 community composition (Blanchet *et al.* 2017). In contrast, we observed that the diversity of our  
541 constructed microbial community was influenced significantly both by the carbon sources present  
542 (e.g. LOM, NOM, or mixtures of the two) and the concentrations and sources of the LOM (Table  
543 S9). E-37 has been previously shown to simultaneously catabolize aromatic compounds via two  
544 different ring cleaving pathways, the benzoyl Co-A and protocatechuate pathways, and derive a  
545 beneficial effect when grown on a mixture of carbon substrates compared to either substrate  
546 presented alone (Gulvik and Buchan 2013). The metabolic synergy between these two aromatic  
547 carbon catabolism pathways may also be a mechanism for OM interactivities that has been  
548 previously overlooked.

549

550 Our studies reveal that structure of the constructed communities may often be determined by the  
551 concentration of LOM provided, regardless of chemical form. With the exception of the highest  
552 coumarate concentration treatment, a general trend emerged: as the concentration of LOM  
553 increases, the diversity within the constructed community decreases. This stands in contrast to  
554 some prior studies in which increasing amounts of autochthonous carbon resulted in increased  
555 degradation of allochthonous carbon, with little to no effect on bacterial community composition  
556 (Attermeyer *et al.* 2014). This decrease in diversity was most pronounced in the highest LOM  
557 additions (400  $\mu$ M-C), where a single strain (Y4I) dominated all, but the coumarate, treatments.  
558 The shorter lag phase and faster growth rate of Y4I relative to other members of the community  
559 when grown on labile substrates may have allowed Y4I to gain an early foothold in the community.  
560 This possibility is supported by the fact that the numerical dominance of Y4I began as early as day  
561 1 in the incubations, after which it either increased in terms of relative abundance or maintained  
562 its numerical dominance in the community (Fig. 3). The stark contrast in community composition  
563 between those cultures provided coumarate compared to the other LOM types is likely due to the

564 unique ability of SE45 and E-37 to utilize coumarate as a carbon source. For the coumarate  
565 treatments, SE45, and to a lesser extent E-37, become the most numerically abundant organisms.  
566 Given that these strains are both ligninolytic they are likely better tuned to access the aromatic  
567 carbon moieties characteristic of NOM (Gonzalez *et al.* 1997; Frank 2016).

568  
569 Cooperation and competition may be important ecological processes influencing the outcome of  
570 interactive effects (Fontaine, Mariotti and Abbadie 2003). Our data indicate both cooperation and  
571 competition under different conditions in the constructed community experiments. For example,  
572 SE45 reached higher cell densities in the constructed community in the presence of both NOM and  
573 400  $\mu\text{M}$ -C coumarate compared to its growth on these substrates in monoculture. Additionally, E-  
574 37 growth is enhanced in the constructed community when provided low concentrations of  
575 tryptone compared to monocultures. This strain may gain an advantage from other members of the  
576 community that produce extracellular peptidases, liberating free amino acids that E-37 is, in turn,  
577 more competitive at transporting and catabolizing. While many bacteria can transport the lower  
578 molecular weight fraction of tryptone directly into cells via oligopeptide permeases (Garault *et al.*  
579 2002), up to 10% of tryptone is between 2-5 kDa (BD Biosciences 2006) and requires initial  
580 cleavage by extracellular peptidases. Extracellular enzymes are generally considered “public  
581 goods” because they may provide benefit to the community, while being costly for individuals to  
582 produce. Individuals within a community who take advantage of public goods without producing  
583 them are termed cheaters and cheating has been shown to increase in frequency in well-mixed  
584 systems with high diffusion rates (Allison *et al.* 2014), such as the culture conditions employed in  
585 this study.

586  
587 In coastal marshes, the dissolved organic carbon pool is highly heterogenous in both structure and  
588 distribution. Similarly, the microbial communities in these systems display a high degree of genetic  
589 and functional diversity and are patchy in both their abundances and activity. Deciphering the  
590 complex chemical and biological interactions that underlie the mineralization of organic carbon in  
591 these systems is a daunting challenge. Yet, a detailed understanding of the nature and sources of  
592 LOM to estuaries, as well as the molecular mechanisms driving interactive effects, will be  
593 necessary to understand the controls on microbial oxidation of terrestrial organic carbon in  
594 estuaries. In order to elucidate microbe-multi-substrate interactivities, controlled laboratory

595 experiments employing relatively low chemical and biological complexity provide an important  
596 foundation on which to build.  
597  
598

599

### **Acknowledgments**

600 We thank Terry Hazen for the use of the respirometer and Melanie Mayes and Hannah Woo for  
601 training on the instrument.

602

603

604

### **Funding**

605 This research was supported by a grant from the National Science Foundation [OCE-1357242]  
606 awarded to AB and ADS.

607

608

## References

- 609 Alberts JJ, Takács M. Importance of humic substances for carbon and nitrogen transport into  
610 southeastern United States estuaries. *Organic Geochemistry*. Vol 30. 1999, 385–95.
- 611 Allison SD, Lu L, Kent AG *et al*. Extracellular enzyme production and cheating in *Pseudomonas*  
612 *fluorescens* depend on diffusion rates. *Front Microbiol* 2014;**5**, DOI:  
613 10.3389/fmicb.2014.00169.
- 614 Arndt S, Jørgensen BB, LaRowe DE *et al*. Quantifying the degradation of organic matter in  
615 marine sediments: A review and synthesis. *Earth-Science Rev* 2013, DOI:  
616 10.1016/j.earscirev.2013.02.008.
- 617 Attermeyer K, Hornick T, Kayler ZE *et al*. Enhanced bacterial decomposition with increasing  
618 addition of autochthonous to allochthonous carbon without any effect on bacterial  
619 community composition. *Biogeosciences* 2014;**11**:1479–89.
- 620 Bakenhus I, Dlugosch L, Billerbeck S *et al*. Composition of total and cell-proliferating  
621 bacterioplankton community in early summer in the North Sea - roseobacters are the most  
622 active component. *Front Microbiol* 2017;**8**, DOI: 10.3389/fmicb.2017.01771.
- 623 BD Biosciences. BD Bionutrients™ Technical Manual - advanced Bioprocessing. 2006:1–72.
- 624 Bengtsson MM, Attermeyer K, Catalán N. Interactive effects on organic matter processing from  
625 soils to the ocean: are priming effects relevant in aquatic ecosystems? *Hydrobiologia* 2018,  
626 DOI: 10.1007/s10750-018-3672-2.
- 627 Benjamini Y, Hochberg Y. Controlling the false discovery rate: a practical and powerful  
628 approach to multiple testing. *J R Stat Soc* 1995;**57**:289–300.
- 629 Bianchi TS. The role of terrestrially derived organic carbon in the coastal ocean: A changing  
630 paradigm and the priming effect. *Proc Natl Acad Sci* 2011;**108**:19473–81.
- 631 Bianchi TS, Thornton DCO, Yvon-Lewis SA *et al*. Positive priming of terrestrially derived  
632 dissolved organic matter in a freshwater microcosm system. *Geophys Res Lett*  
633 2015;**42**:5460–7.
- 634 Blagodatskaya E, Kuzyakov Y. Mechanisms of real and apparent priming effects and their  
635 dependence on soil microbial biomass and community structure: Critical review. *Biol Fertil*  
636 *Soils* 2008;**45**:115–31.
- 637 Blanchet M, Pringault O, Panagiotopoulos C *et al*. When riverine dissolved organic matter  
638 (DOM) meets labile DOM in coastal waters: changes in bacterial community activity and  
639 composition. *Aquat Sci* 2017, DOI: 10.1007/s00027-016-0477-0.
- 640 Brum JR, Hurwitz BL, Schofield O *et al*. Seasonal time bombs: Dominant temperate viruses  
641 affect Southern Ocean microbial dynamics. *ISME J* 2016, DOI: 10.1038/ismej.2015.125.
- 642 Buchan A, Collier LS, Neidle EL *et al*. Key aromatic-ring-cleaving enzyme, protocatechuate 3,4-  
643 dioxygenase, in the ecologically important marine Roseobacter lineage. *Appl Environ*  
644 *Microbiol* 2000;**66**:4662–72.
- 645 Buchan A, González JM, Moran MA. Overview of the marine Roseobacter lineage. *Appl*  
646 *Environ Microbiol* 2005;**71**:5665–77.
- 647 Catalán N, Kellerman AM, Peter H *et al*. Absence of a priming effect on dissolved organic  
648 carbon degradation in lake water. *Limnol Oceanogr* 2015a;**60**:159–68.
- 649 Chua MJ. Genomic and Physiological Characterization of Lignin-Derived Aromatic Catabolism  
650 Pathways in Roseobacters. 2018.
- 651 Costerton JW, Lewandowski Z, Caldwell DE *et al*. Microbial Biofilms. *Annu Rev Microbiol*  
652 1995;**49**:711–45.
- 653 Cude WN, Mooney J, Tavanaei AA *et al*. Production of the antimicrobial secondary metabolite

- 654 indigoidine contributes to competitive surface colonization by the marine roseobacter  
655 *Phaeobacter* sp. strain Y4I. *Appl Environ Microbiol* 2012;**78**:4771–80.
- 656 Czyz A, Los M, Wrobel B *et al.* Inhibition of spontaneous induction of lambdoid prophages in  
657 *Escherichia coli* cultures: Simple procedures with possible biotechnological applications.  
658 *BMC Biotechnol* 2001, DOI: 10.1186/1472-6750-1-1.
- 659 D’Errico G, Giovannelli D, Montano C *et al.* Bioremediation of high organic load lagoon  
660 sediments: Compost addition and priming effects. *Chemosphere* 2013, DOI:  
661 10.1016/j.chemosphere.2012.11.037.
- 662 Dal S, Steiner I, Gerischer U. Multiple operons connected with catabolism of aromatic  
663 compounds in *Acinetobacter* sp. strain ADP1 are under carbon catabolite repression. *J Mol*  
664 *Microbiol Biotechnol* 2002;**4**:389–404.
- 665 Dang H, Li T, Chen M *et al.* Cross-ocean distribution of Rhodobacterales bacteria as primary  
666 surface colonizers in temperate coastal marine waters. *Appl Environ Microbiol* 2008;**74**:52–  
667 60.
- 668 Dang H, Lovell CR. Bacterial primary colonization and early succession on surfaces in marine  
669 waters as determined by amplified rRNA gene restriction analysis and sequence analysis of  
670 16S rRNA genes. *Appl Environ Microbiol* 2000;**66**:467–75.
- 671 Feiner R, Argov T, Rabinovich L *et al.* A new perspective on lysogeny: Prophages as active  
672 regulatory switches of bacteria. *Nat Rev Microbiol* 2015, DOI: 10.1038/nrmicro3527.
- 673 Fontaine S, Mariotti A, Abbadie L. The priming effect of organic matter: A question of microbial  
674 competition? *Soil Biol Biochem* 2003, DOI: 10.1016/S0038-0717(03)00123-8.
- 675 Frank AM. Aerobic bacterial transformations of lignin-derived aromatic compounds. 2016.
- 676 Garault P, Le Bars D, Besset C *et al.* Three oligopeptide-binding proteins are involved in the  
677 oligopeptide transport of *Streptococcus thermophilus*. *J Biol Chem* 2002;**277**:32–9.
- 678 Gontikaki E, Thornton B, Cornulier T *et al.* Occurrence of priming in the degradation of  
679 lignocellulose in marine sediments. *PLoS One* 2015;**10**, DOI:  
680 10.1371/journal.pone.0143917.
- 681 Gontikaki E, Thornton B, Huvenne VAI *et al.* Negative Priming Effect on Organic Matter  
682 Mineralisation in NE Atlantic Slope Sediments. Shah V (ed.). *PLoS One* 2013;**8**:e67722.
- 683 González JM, Kiene RP, Moran MA. Transformation of sulfur compounds by an abundant  
684 lineage of marine bacteria in the  $\alpha$ -subclass of the class Proteobacteria. *Appl Environ*  
685 *Microbiol* 1999;**65**:3810–9.
- 686 Gonzalez JM, Mayer F, Moran M a *et al.* *Sagittula stellata* gen. nov., sp. nov., a lignin-  
687 transforming bacterium from a coastal environment. *Int J Syst Bacteriol* 1997;**47**:773–80.
- 688 Guenet B, Danger M, Abbadie L *et al.* Priming effect: Bridging the gap between terrestrial and  
689 aquatic ecology. *Ecology* 2010;**91**:2850–61.
- 690 Gulvik CA, Buchan A. Simultaneous Catabolism of Plant-Derived Aromatic Compounds Results  
691 in Enhanced Growth for Members of the Roseobacter Lineage. *Appl Environ Microbiol*  
692 2013;**79**:3716–23.
- 693 Hansell DA. Recalcitrant Dissolved Organic Carbon Fractions. *Ann Rev Mar Sci* 2013, DOI:  
694 10.1146/annurev-marine-120710-100757.
- 695 Hedges JI, Blanchette RA, Weliky K *et al.* Effects of fungal degradation on the CuO oxidation  
696 products of lignin: A controlled laboratory study. *Geochim Cosmochim Acta* 1988;**52**:2717–  
697 26.
- 698 Hedges JI, Keil RG, Benner R. What happens to terrestrial organic matter in the ocean? *Organic*  
699 *Geochemistry*. Vol 27. 1997, 195–212.



- 700 Her N, Amy G, McKnight D *et al.* Characterization of DOM as a function of MW by  
701 fluorescence EEM and HPLC-SEC using UVA, DOC, and fluorescence detection. *Water*  
702 *Res* 2003, DOI: 10.1016/S0043-1354(03)00317-8.
- 703 Howes W V. Effect of glucose on the capacity of Escherichia coli to be infected by a virulent  
704 lambda bacteriophage. *J Bacteriol* 1965.
- 705 Hyndes GA, Nagelkerken I, Mcleod RJ *et al.* Mechanisms and ecological role of carbon transfer  
706 within coastal seascapes. *Biol Rev* 2014;**89**:232–54.
- 707 Jenkinson DS, Fox RH, Rayner JH. Interactions between fertilizer nitrogen and soil nitrogen—  
708 the so-called ‘priming’ effect. *J Soil Sci* 1985;**36**:425–44.
- 709 Jost L. Partitioning diversity into independent alpha and beta components. *Ecology*  
710 2007;**88**:2427–39.
- 711 Kuzyakov Y, Friedel JK, Stahr K. Review of mechanisms and quantification of priming effects.  
712 *Soil Biol Biochem* 2000;**32**:1485–98.
- 713 Langenheder S, Kisand V, Lindström ES *et al.* Growth dynamics within bacterial communities in  
714 riverine and estuarine batch cultures. *Aquat Microb Ecol* 2004;**37**:137–48.
- 715 Lechtenfeld OJ, Hertkorn N, Shen Y *et al.* Marine sequestration of carbon in bacterial  
716 metabolites. *Nat Commun* 2015, DOI: 10.1038/ncomms7711.
- 717 Mannino A, Harvey HR. Terrigenous dissolved organic matter along an estuarine gradient and  
718 its flux to the coastal ocean. *Org Geochem* 2000;**31**:1611–25.
- 719 Mazzoli R, Pessione E, Giuffrida MG *et al.* Degradation of aromatic compounds by  
720 *Acinetobacter radioresistens* S13: Growth characteristics on single substrates and mixtures.  
721 *Arch Microbiol* 2007;**188**:55–68.
- 722 Medeiros PM, Seidel M, Gifford SM *et al.* Microbially-Mediated Transformations of Estuarine  
723 Dissolved Organic Matter. *Front Mar Sci* 2017;**4**, DOI: 10.3389/fmars.2017.00069.
- 724 Moran MA, Belas R, Schell MA *et al.* Ecological genomics of marine roseobacters. *Appl*  
725 *Environ Microbiol* 2007;**73**:4559–69.
- 726 Mou X, Sun S, Edwards RA *et al.* Bacterial carbon processing by generalist species in the  
727 coastal ocean. *Nature* 2008;**451**:708–11.
- 728 Newton RJ, Griffin LE, Bowles KM *et al.* Genome characteristics of a generalist marine  
729 bacterial lineage. *ISME J* 2010;**4**:784–98.
- 730 Novitsky JA, Morita RY. Possible strategy for the survival of marine bacteria under starvation  
731 conditions. *Mar Biol* 1978, DOI: 10.1007/BF00397156.
- 732 Oksanen J, Blanchet FG, Kindt R *et al.* vegan: Community Ecology Package. *R Packag ver 24–3*  
733 2017:282.
- 734 Osburn CL, Boyd TJ, Montgomery MT *et al.* Optical Proxies for Terrestrial Dissolved Organic  
735 Matter in Estuaries and Coastal Waters. *Front Mar Sci* 2016;**2**, DOI:  
736 10.3389/fmars.2015.00127.
- 737 R Core team. R Core Team. *R A Lang Environ Stat Comput R Found Stat Comput*, Vienna,  
738 Austria ISBN 3-900051-07-0, URL <http://wwwR-project.org/> 2015;**55**:275–86.
- 739 Roux S, Enault F, Hurwitz BL *et al.* VirSorter: mining viral signal from microbial genomic data.  
740 *PeerJ* 2015, DOI: 10.7717/peerj.985.
- 741 Sipler RE, Kellogg CTE, Connelly TL *et al.* Microbial Community Response to Terrestrially  
742 Derived Dissolved Organic Matter in the Coastal Arctic. *Front Microbiol* 2017;**8**:1018.
- 743 Slightom RN, Buchan A. Surface colonization by marine roseobacters: Integrating genotype and  
744 phenotype. *Appl Environ Microbiol* 2009;**75**:6027–37.
- 745 Steen AD, Quigley LN, Buchan A. Evidence for the Priming Effect in a Planktonic Estuarine

- 746 Microbial Community Andrew. *Front Mar Sci* 2016, DOI: 10.3389/fmars.2016.00006.  
747 Sun L, Perdue EM, Meyer JL *et al.* Use of elemental composition to predict bioavailability of  
748 dissolved organic matter in a Georgia river. *Limnol Oceanogr* 1997;**42**:714–21.  
749 Vannote RL, Minshall GW, Cummins KW *et al.* The River Continuum Concept. *Can J Fish*  
750 *Aquat Sci* 1980;**37**:130–7.  
751 Ward ND, Bianchi TS, Sawakuchi HO *et al.* The reactivity of plant-derived organic matter and  
752 the potential importance of priming effects along the lower Amazon River. *J Geophys Res*  
753 *Biogeosciences* 2016;**121**:1522–39.  
754 Ward ND, Keil RG, Medeiros PM *et al.* Degradation of terrestrially derived macromolecules in  
755 the Amazon River. *Nat Geosci* 2013;**6**, DOI: 10.1038/ngeo1817.  
756 Wickham H. ggplot 2 Version 1. *Media* 2009;**35**:211.  
757 Wiegart RG, Freeman BJ. Tidal marshes of the southeastern Atlantic coast: a community profile.  
758 *US Fish Wildl Serv* 1990;**85**:1–80.  
759 Zinser ER, Kolter R. Mutations Enhancing Amino Acid Catabolism Confer a Growth Advantage  
760 in Stationary Phase. *J Bacteriol* 1999;**181**:5800–7.  
761  
762

763 **Table 1. Genomic evidence for aromatic carbon catabolism pathways and prophages**  
 764 **present in Roseobacter strains used in this study.**

765

| Aromatic catabolism pathway                   | Isolate                                 |                                         |                                                 |                                             |                                             |                                                |
|-----------------------------------------------|-----------------------------------------|-----------------------------------------|-------------------------------------------------|---------------------------------------------|---------------------------------------------|------------------------------------------------|
|                                               | <i>Citricella</i> sp. SE45 <sup>a</sup> | <i>Phaeobacter</i> sp. Y41 <sup>b</sup> | <i>Roseovarius nubinhibens</i> ISM <sup>b</sup> | <i>Sagittula stellata</i> E-37 <sup>b</sup> | <i>Sulfitobacter</i> sp. EE-36 <sup>b</sup> | <i>Sulfitobacter</i> sp. NAS-14.1 <sup>b</sup> |
| β-ketoadipate (protocatechuate)               | +                                       | +                                       | +                                               | +                                           | +                                           | +                                              |
| Gentisate                                     | +                                       | -                                       | -                                               | +                                           | -                                           | -                                              |
| Benzoyl-CoA                                   | -                                       | -                                       | -                                               | +                                           | -                                           | -                                              |
| Phenylacetic acid                             | +                                       | +                                       | -                                               | +                                           | +                                           | +                                              |
| Homoprotocatechuate                           | -                                       | +                                       | -                                               | +                                           | -                                           | -                                              |
| Homogentisate                                 | +                                       | +                                       | -                                               | +                                           | -                                           | -                                              |
| Predicted prophage-like elements <sup>c</sup> | 2                                       | 4                                       | 0                                               | 5                                           | 0                                           | 0                                              |

766 <sup>a</sup> Genomic data derived from Chua 2018.

767 <sup>b</sup> Genomic data derived from Buchan & Gonzalez, 2010 and Newton et al., 2010.

768 <sup>c</sup> Determined using VirSorter (Roux et al., 2015).

769

770

771 **Table 2. Organic carbon composition of the comparative treatments groups used to test for**  
 772 **interactive effects**

773

| Comparative treatment group | NoC <sup>a</sup> | LOM <sup>b</sup> | NOM <sup>c</sup> | 774<br>775<br>776<br>777<br>778<br>mix <sup>d</sup> |
|-----------------------------|------------------|------------------|------------------|-----------------------------------------------------|
| 400 μM-C                    | No OC added      | 400 μM-C LOM     | 2 mM-C NOM       | 400 μM-C LOM (16.67%)<br>2 mM-C NOM (83.33%)        |
| 40 μM-C                     | No OC added      | 40 μM-C LOM      | 2 mM-C NOM       | 40 μM-C LOM (1.67%)<br>2 mM-C NOM (98.33%)          |
| 4 μM-C                      | No OC added      | 4 μM-C LOM       | 2 mM-C NOM       | 4 μM-C LOM (0.17%)<br>2 mM-C NOM (99.83%)           |
| 1 μM-C                      | No OC added      | 1 μM-C LOM       | 2 mM-C NOM       | 1 μM-C LOM (0.04%)<br>2 mM-C NOM (99.96%)           |

800

801 <sup>a</sup> No carbon added (base medium), tests for microbial activity in the absence of added organic  
 802 carbon.

803  
 804 <sup>b</sup> Labile organic matter, (acetate, casamino acids + tryptophan, coumarate, or tryptone) added at  
 805 one of four concentrations.

806  
 807 <sup>c</sup> Natural organic matter (recalcitrant organic matter).

808  
 809 <sup>d</sup> Mixed substrate treatments. Values in parentheses indicate the relative contribution of LOM and  
 810 NOM to the total organic carbon pool. To assess interactivity in mix treatments, those data are  
 811 compared to composite data which is the sum of results of the LOM and NOM treatments.

812  
 813  
 814  
 815  
 816  
 817

818

819 **Table 3. Probability values<sup>a</sup> for monoculture interactive effects experiments shown in**  
 820 **Figure 1 for strains SE45 and E-37.**

| <b>LOM Concentration<sup>b</sup></b> |                                          |                                               |                                            |                                                       |
|--------------------------------------|------------------------------------------|-----------------------------------------------|--------------------------------------------|-------------------------------------------------------|
| <b>LOM Source</b>                    | <b>1 <math>\mu</math>M-C</b>             | <b>4 <math>\mu</math>M-C</b>                  | <b>40 <math>\mu</math>M-C</b>              | <b>400 <math>\mu</math>M-C</b>                        |
| <b>Acetate</b>                       | <u>SE45</u><br>Days 1,4,7<br>$p < 0.05$  | <u>SE45</u><br>Days 2, 4<br>$p < 0.05$        | <u>SE45</u><br>Days 2, 4, 7<br>$p < 0.05$  | <u>SE45</u><br>Days 2, 7, 10<br>$p < 0.001$           |
|                                      | <u>E-37</u><br>Day 1<br>$p < 0.05$       | <u>E-37</u><br>Days 7<br>$p < 0.001$          | <u>E-37</u><br>Days 10, 14<br>$p < 0.05$   | <u>E-37</u><br>Days 1, 2, 4, 10, 14<br>$p < 0.01$     |
| <b>Casamino Acids</b>                | <u>SE45</u><br>Day 10, 14<br>$p < 0.05$  | <u>SE45</u><br>Days 1, 2, 10<br>$p < 0.05$    | <u>SE45</u><br>Day 1<br>$p < 0.05$         | <u>SE45</u><br>Day 4 $p < 0.001$<br>Day 7 $p < 0.001$ |
|                                      | <u>E-37</u><br>No significant difference | <u>E-37</u><br>Days 1, 4, 14<br>$p < 0.05$    | <u>E-37</u><br>Days 2, 14<br>$p < 0.05$    | <u>E-37</u><br>Day 14<br>$p < 0.05$                   |
| <b>Coumarate</b>                     | <u>SE45</u><br>No significant difference | <u>SE45</u><br>Days 1, 2, 4, 10<br>$p < 0.05$ | <u>SE45</u><br>Days 2, 7<br>$p < 0.05$     | <u>SE45</u><br>Day 2<br>$p < 0.05$                    |
|                                      | <u>E-37</u><br>Day 1<br>$p < 0.05$       | <u>E-37</u><br>Day 1, 4, 10, 14<br>$p < 0.05$ | <u>E-37</u><br>Day 10<br>$p < 0.05$        | <u>E-37</u><br>Days 1, 10<br>$p < 0.05$               |
| <b>Tryptone</b>                      | <u>SE45</u><br>No significant difference | <u>SE45</u><br>Days 1, 2, 4<br>$p < 0.01$     | <u>SE45</u><br>Days 1, 4, 7<br>$p < 0.05$  | <u>SE45</u><br>Day 1<br>$p < 0.001$                   |
|                                      | <u>E-37</u><br>No significant difference | <u>E-37</u><br>Day 10<br>$p < 0.01$           | <u>E-37</u><br>Days 1, 7, 10<br>$p < 0.05$ | <u>E-37</u><br>Days 1, 4, 7, 14<br>$p < 0.05$         |

821

822 <sup>a</sup> For each day, a three-way ANOVA was performed to determine whether differences in cell  
823 densities were being driven by treatment, concentration or source of LOM. *p*-values are adjusted  
824 to correct for the false discovery rate using the Benjamini-Hochberg correction.

825  
826 <sup>b</sup> Days listed are days in which there was a significant difference between the composite and mixed  
827 treatments. Each strain is underlined and situated directly above the experimental days and their  
828 probability values. *p*-values for synergistic interactive effects are **bolded** and the corresponding  
829 table cell is shaded gray; *p*-values for antagonistic interactive effects are *italicized*.

830  
831

832 **Table 4. Probability values<sup>a</sup> for constructed community interactive effects experimental**  
 833 **data shown in Figure 1.**

834

| <b>LOM Concentration<sup>b</sup></b> |                                                       |                                             |                                          |                                                       |
|--------------------------------------|-------------------------------------------------------|---------------------------------------------|------------------------------------------|-------------------------------------------------------|
| <b>LOM Source</b>                    | <b>1 μM-C</b>                                         | <b>4 μM-C</b>                               | <b>40 μM-C</b>                           | <b>400 μM-C</b>                                       |
| <b>Acetate</b>                       | <i>Days 1, 4, 7</i><br><i>p &lt; 0.05</i>             | <i>Days 1, 10, 14</i><br><i>p &lt; 0.05</i> | <i>Day 10 p &lt; 0.01</i>                | <b>Days 4, 10, 14</b><br><b>p &lt; 0.05</b>           |
| <b>Casamino Acids</b>                | <i>Days 1, 2, 4, 7, 10, 14</i><br><i>p &lt; 0.005</i> | No Significant Difference                   | <i>Days 1, 14</i><br><i>p &lt; 0.001</i> | <i>Day 4 p &lt; 0.01</i><br><b>Day 10 p &lt; 0.01</b> |
| <b>Coumarate</b>                     | <i>Days 1, 2, 7, 10, 14</i><br><i>p &lt; 0.001</i>    | No Significant Difference                   | No Significant Difference                | <b>Days 1, 7</b><br><b>p &lt; 0.001</b>               |
| <b>Tryptone</b>                      | <i>Days 1, 2, 7, 10, 14</i><br><i>p &lt; 0.001</i>    | <i>Days 1, 4 p &lt; 0.05</i>                | <b>Day 10</b><br><b>p &lt; 0.001</b>     | <b>Days 10, 14</b><br><b>p &lt; 0.01</b>              |

835 <sup>a</sup> For each day, a three-way ANOVA was performed to determine whether differences in cell  
 836 densities were being driven by treatment, concentration or source of LOM. *p*-values are adjusted  
 837 to correct for the false discovery rate using the Benjamini-Hochberg correction.  
 838

839 <sup>b</sup> Days listed are days in which there was a significant difference between the composite and mixed  
 840 treatments. *p*-values for synergistic interactive effects are **bolded** and the corresponding table cell  
 841 is shaded gray; *p*-values for antagonistic interactive effects are *italicized*.

842

843

844

845 **Table 5. Probability values<sup>a</sup> for respiration interactive effects experimental data shown in**  
 846 **Figures 2 & 4.**

847

| <b>LOM Concentration<sup>b</sup></b> |                                                                                       |                                                                              |                                                                               |                                                                                         |
|--------------------------------------|---------------------------------------------------------------------------------------|------------------------------------------------------------------------------|-------------------------------------------------------------------------------|-----------------------------------------------------------------------------------------|
| <b>LOM Source</b>                    | <b>1 <math>\mu</math>M-C</b>                                                          | <b>4 <math>\mu</math>M-C</b>                                                 | <b>40 <math>\mu</math>M-C</b>                                                 | <b>400 <math>\mu</math>M-C</b>                                                          |
| <b>Acetate</b>                       | Not Measured                                                                          | Not Measured                                                                 | Not Measured                                                                  | SE45: <i>p</i> < 0.30<br>E-37: <b><i>p</i> &lt; 0.001</b><br>Community: <i>p</i> < 0.50 |
| <b>Casamino Acids</b>                | SE45: <b><i>p</i> &lt; 0.05</b><br>E-37: <i>p</i> < 0.33<br>Community: <i>p</i> < 0.6 | SE45: <i>p</i> < 0.25<br>E-37: <i>p</i> < 0.35<br>Community: <i>p</i> < 0.33 | SE45: <i>p</i> < 0.45<br>E-37: <i>p</i> < 0.95<br>Community: <i>p</i> < 0.001 | SE45: <i>p</i> < 0.05<br>E-37: <b><i>p</i> &lt; 0.001</b><br>Community: <i>p</i> < 0.60 |
| <b>Coumarate</b>                     | Not Measured                                                                          | Not Measured                                                                 | Not Measured                                                                  | SE45: <i>p</i> < 0.55<br>E-37: <b><i>p</i> &lt; 0.001</b><br>Community: <i>p</i> < 0.20 |

848 <sup>a</sup> Due to the unbalanced nature of the respirometer experimental design, two three-way ANOVAs  
 849 were used to analyze the differences between mix and composite in terms of final CO<sub>2</sub>  
 850 accumulation. The two ANOVA models used tested whether the independent variables of  
 851 inoculum, treatment, and either LOM source or concentration interacted to affect CO<sub>2</sub>  
 852 accumulation. As the 400  $\mu$ M-C Casamino Acids data were analyzed in both ANOVAs, the higher  
 853 of the two resulting *p*-value from the post hoc test were used to determine significance. *p*-values  
 854 are adjusted to correct for the false discovery rate using the Benjamini-Hochberg correction.  
 855

856 <sup>b</sup> *p*-values for synergistic interactive effects are **bolded**; *p*-values for antagonistic interactive  
 857 effects are *italicized*.

858

859

860



## Figures legends

861  
862  
863 **Figure 1. Viable counts for monocultures of (A) SE45, (B) E-37 and (C) constructed**  
864 **communities in composite (dashed line), LOM alone (blue line), mix (black line), No**  
865 **Carbon control (red line) and NOM alone control (green line) treatments.**

866 The composite treatment is the sum of results of the LOM and NOM treatments. Points represent  
867 the mean (n=3-5); error bars represent one standard deviation from the mean. Seeding densities  
868 for SE45, E-37 and six-member constructed community were  $1.51 \times 10^4$  CFU/mL ( $\pm 5.1 \times 10^3$ ),  
869  $4.23 \times 10^4$  CFU/mL ( $\pm 9 \times 10^3$ ) and  $7.01 \times 10^3$  CFU/mL ( $\pm 2.6 \times 10^3$ ), respectively. Significant  
870 interactive effect for individual timepoints are shown in Fig. S3 (E-37 and SE45) and Fig. S4  
871 (constructed community).

872  
873 **Figure 2. Cumulative CO<sub>2</sub> production from SE45 and E-37 monocultures when provided (A)**  
874 **low concentrations of casamino acids and (B) high concentrations (400  $\mu$ M-C) of acetate,**  
875 **casamino acids, and coumarate.**

876 Composite data (sum of LOM and NOM treatments) are shown in grey; mixed substrate data in  
877 orange. The average of the No C control was subtracted from all replicates. Points represent the  
878 mean (n=2-3); error bars represent one standard deviation from the mean. Red plus signs indicate  
879 a significant synergistic interactive effect ( $p < 0.05$ ), blue minus signs indicate an antagonistic  
880 interactive effect ( $p < 0.05$ ). The seeding densities for SE45 and E-37 were  $3.05 \times 10^4$  CFU/mL  
881 ( $\pm 7.97 \times 10^3$ ),  $1.43 \times 10^4$  CFU/mL ( $\pm 4.71 \times 10^3$ ), respectively. Final cumulative CO<sub>2</sub> produced for  
882 all control treatments is shown in Table S4.

883  
884 **Figure 3. Community composition of the six-member constructed community in response**  
885 **to treatments with varying concentrations of (A) acetate (B) casamino acids, (C) coumarate**  
886 **and (D) tryptone.**

887 Community composition is displayed in relative abundance and individual strains are color-  
888 coded according to the key. Each LOM alone treatment is displayed above its corresponding mix  
889 treatment. No carbon and NOM alone controls are shown in panels (E) and (F), respectively.  
890 The paired NOM and No C treatment community compositions for the 1  $\mu$ M LOM  
891 concentrations are shown on the left and those for the for the 4, 40 and 400  $\mu$ M are shown on the  
892 right. Seeding density for the constructed communities was  $7.01 \times 10^3$  CFU/mL ( $\pm 2.6 \times 10^3$ ).

893  
894  
895  
896  
897  
898  
899  
900  
901  
902  
903  
904  
905  
906  
907

**Figure 4. Cumulative CO<sub>2</sub> production for the six-member constructed community provided different sources and concentrations of LOM.**

Composite data (sum of LOM and NOM) are shown in grey; mixed substrate data in orange. The average of the No C control was subtracted from all replicates. Points represent the mean (n=2-3) while error bars represent one standard deviation from the mean. Red plus signs indicate a significant synergistic interactive effect ( $p < 0.05$ ) and blue minus signs indicate an antagonistic interactive effect ( $p < 0.05$ ). The seeding density was  $5.13 \times 10^3$  CFU/mL ( $\pm 3.73 \times 10^3$ ). Final cumulative CO<sub>2</sub> produced for all control treatments is shown in Table S4.

A. SE45

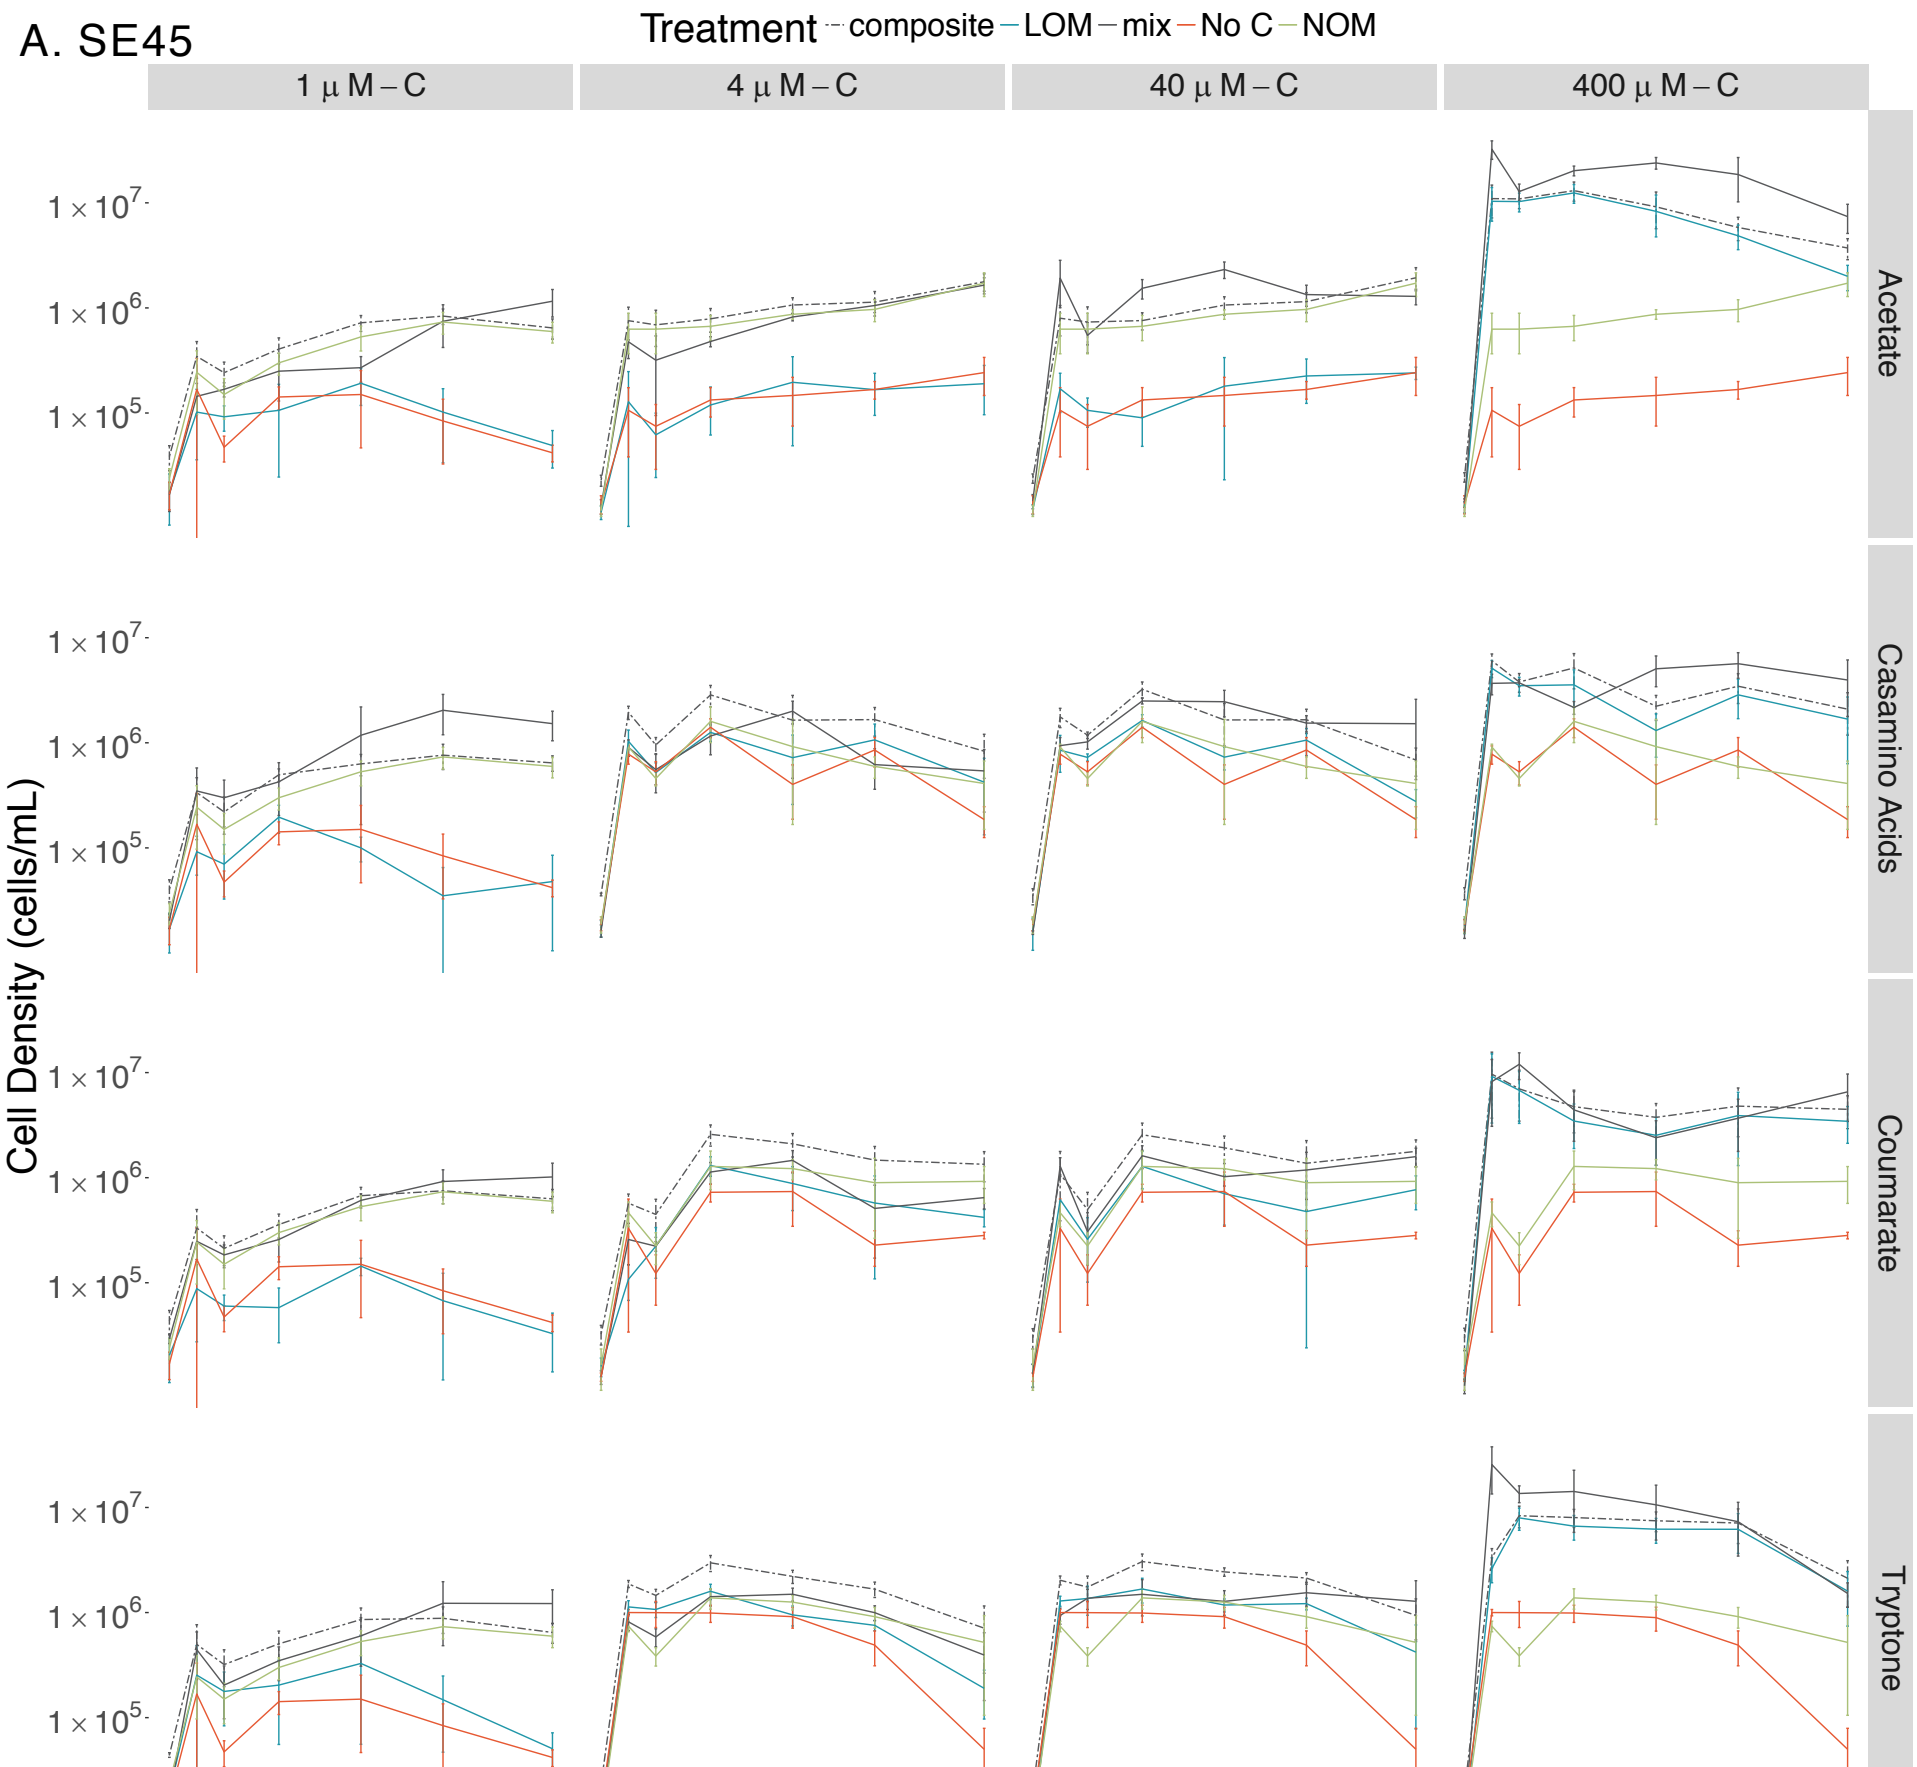

B. E-37

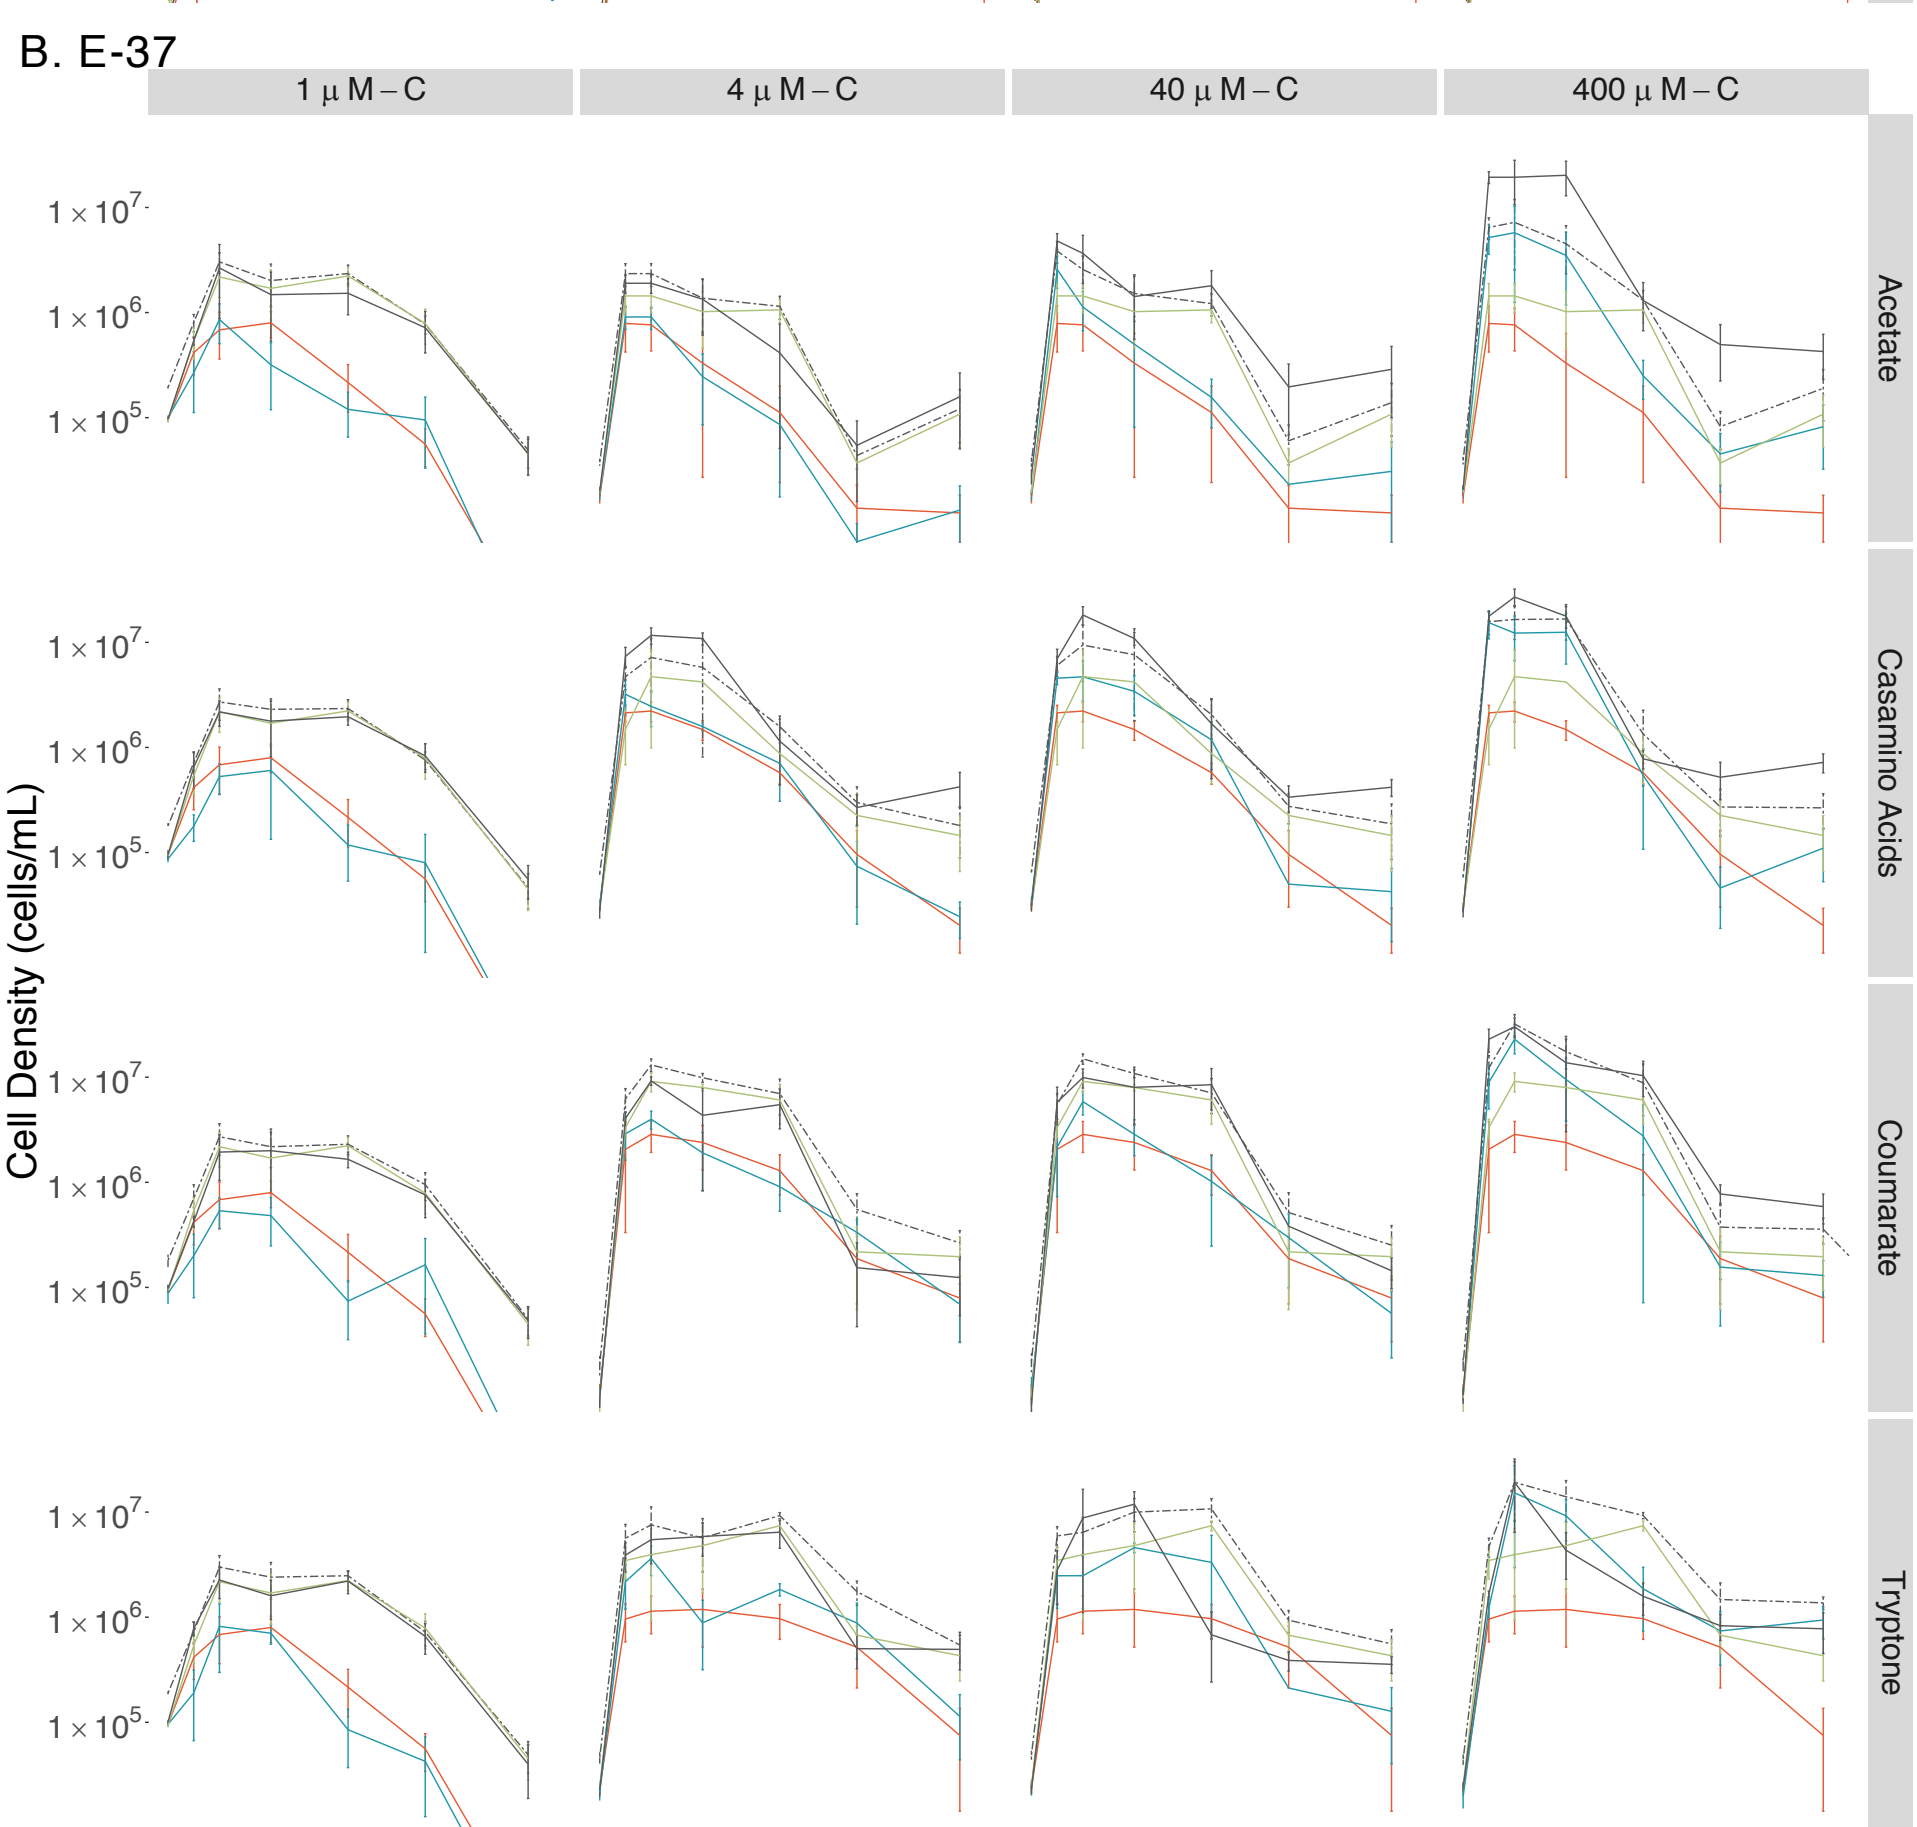

C. Constructed Community

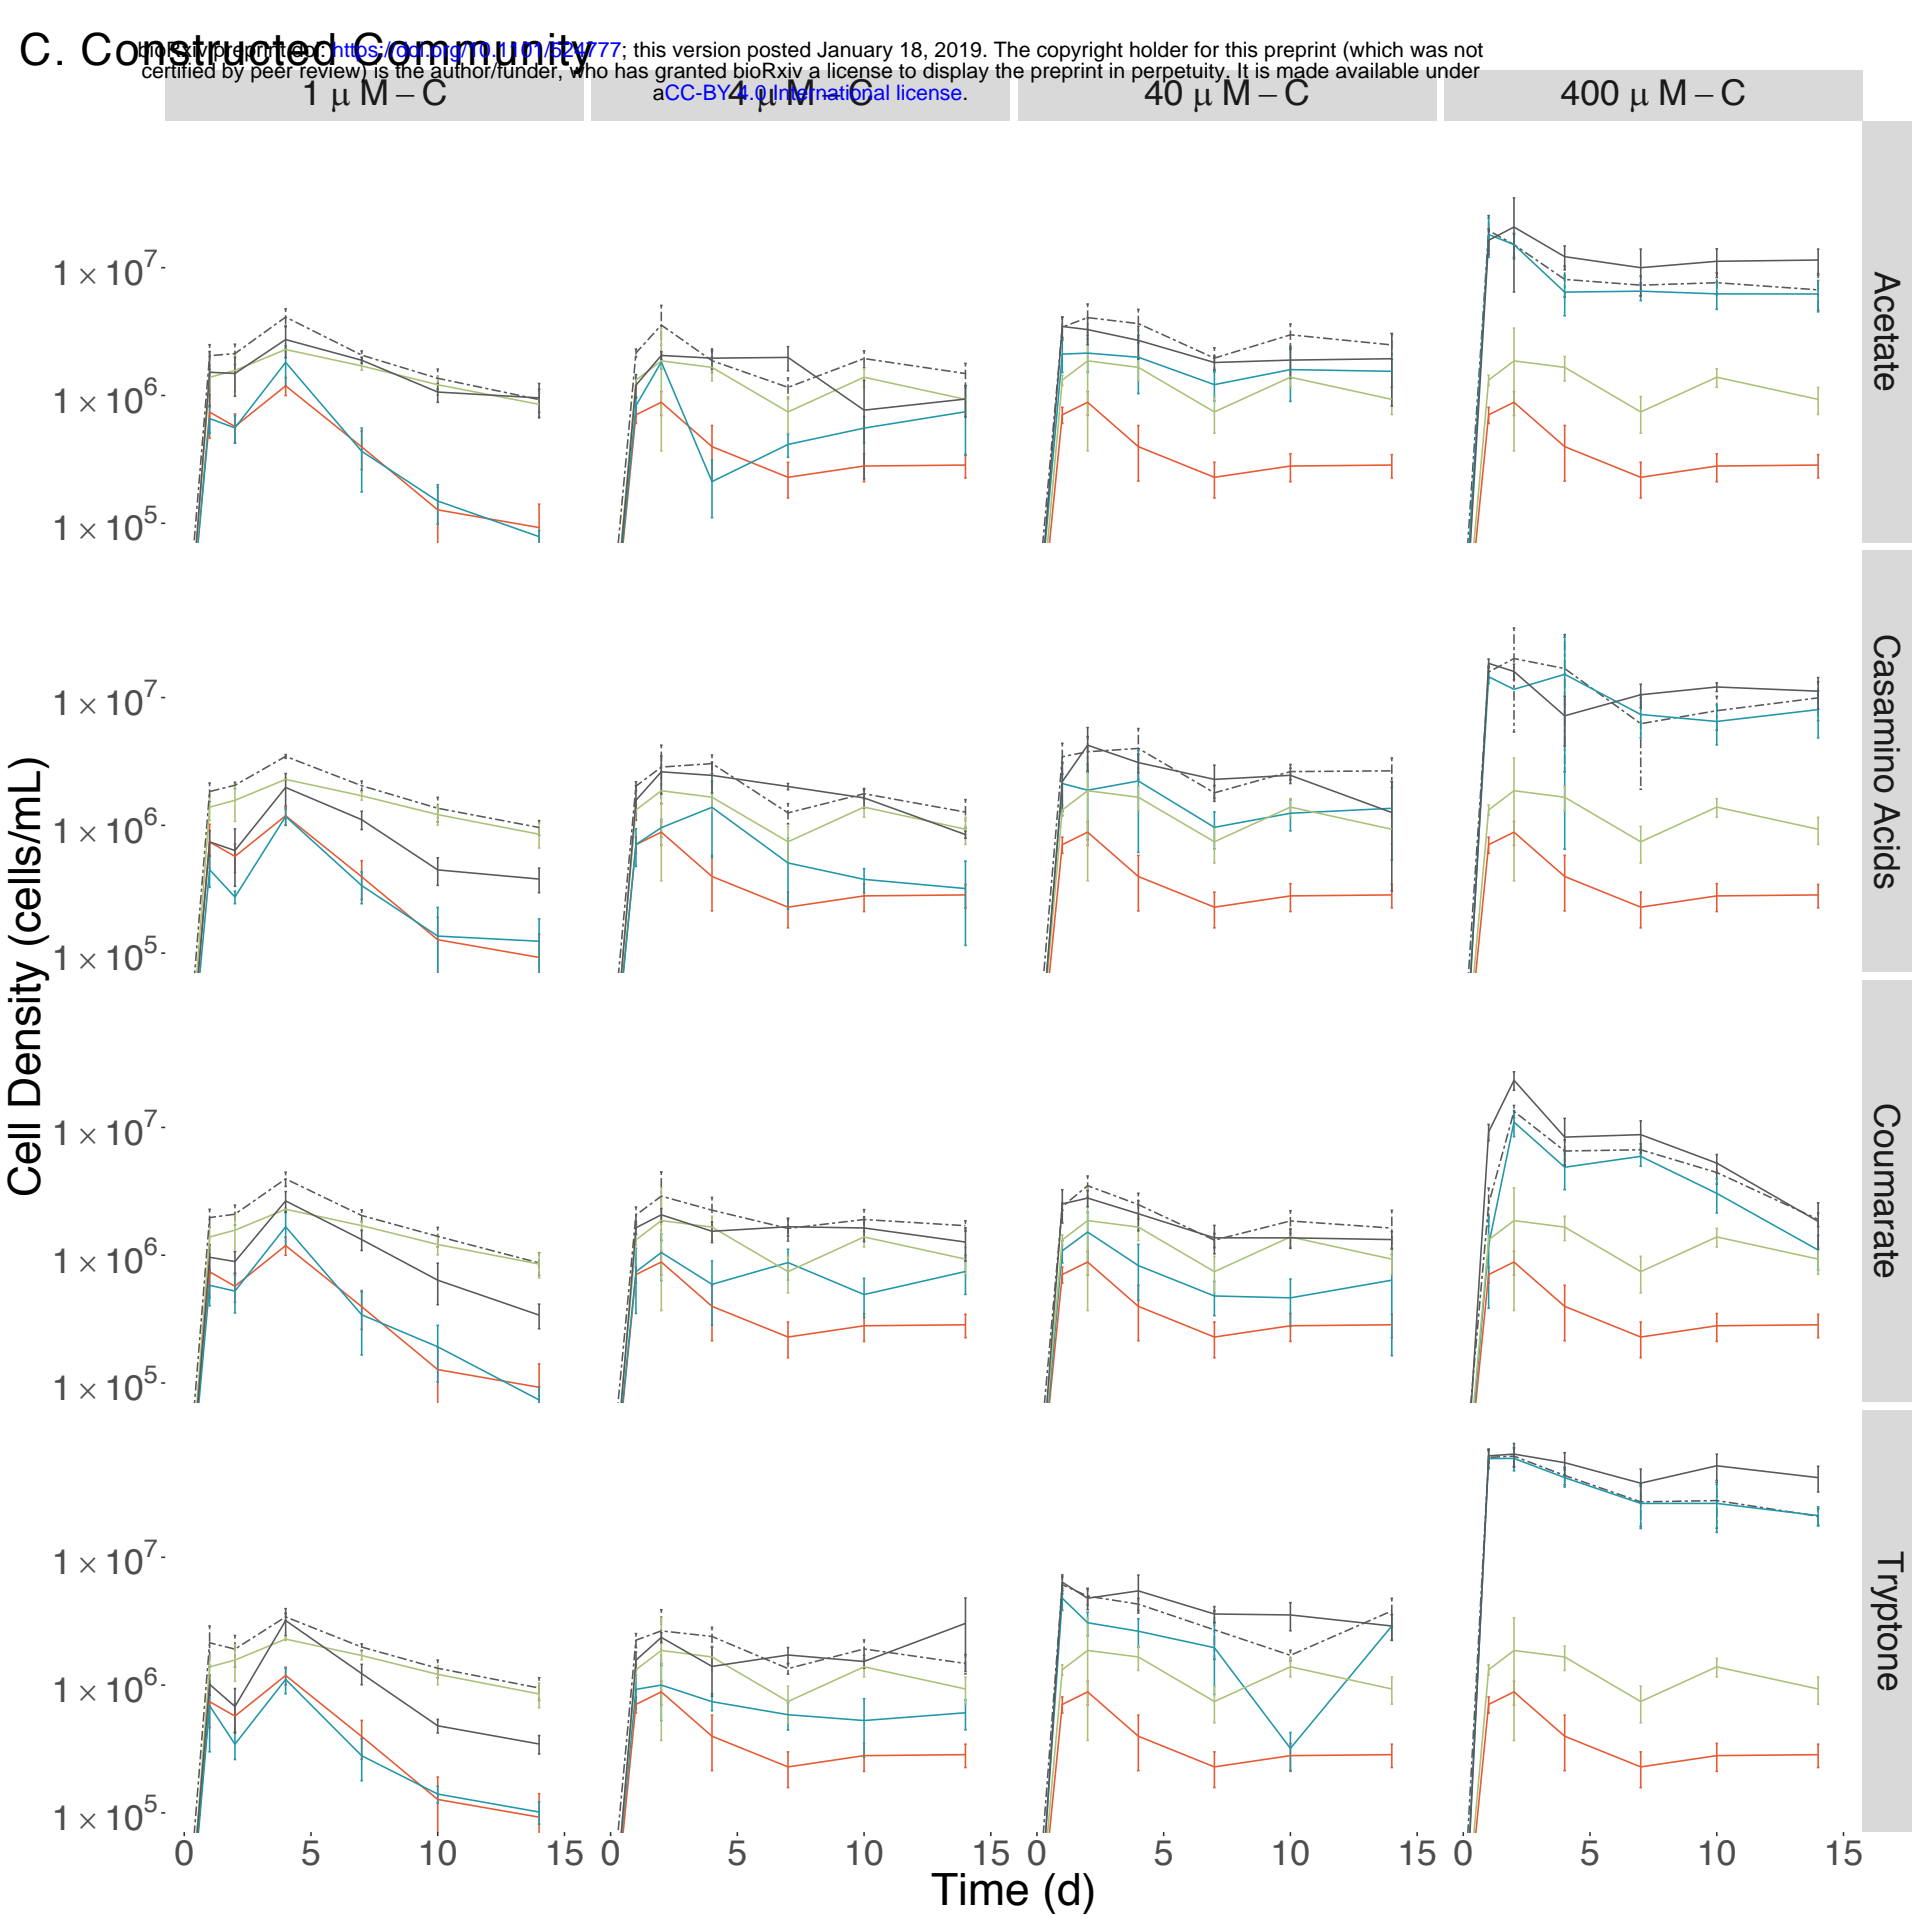

A. Low Concentrations of casamino acids Treatment — composite — mix

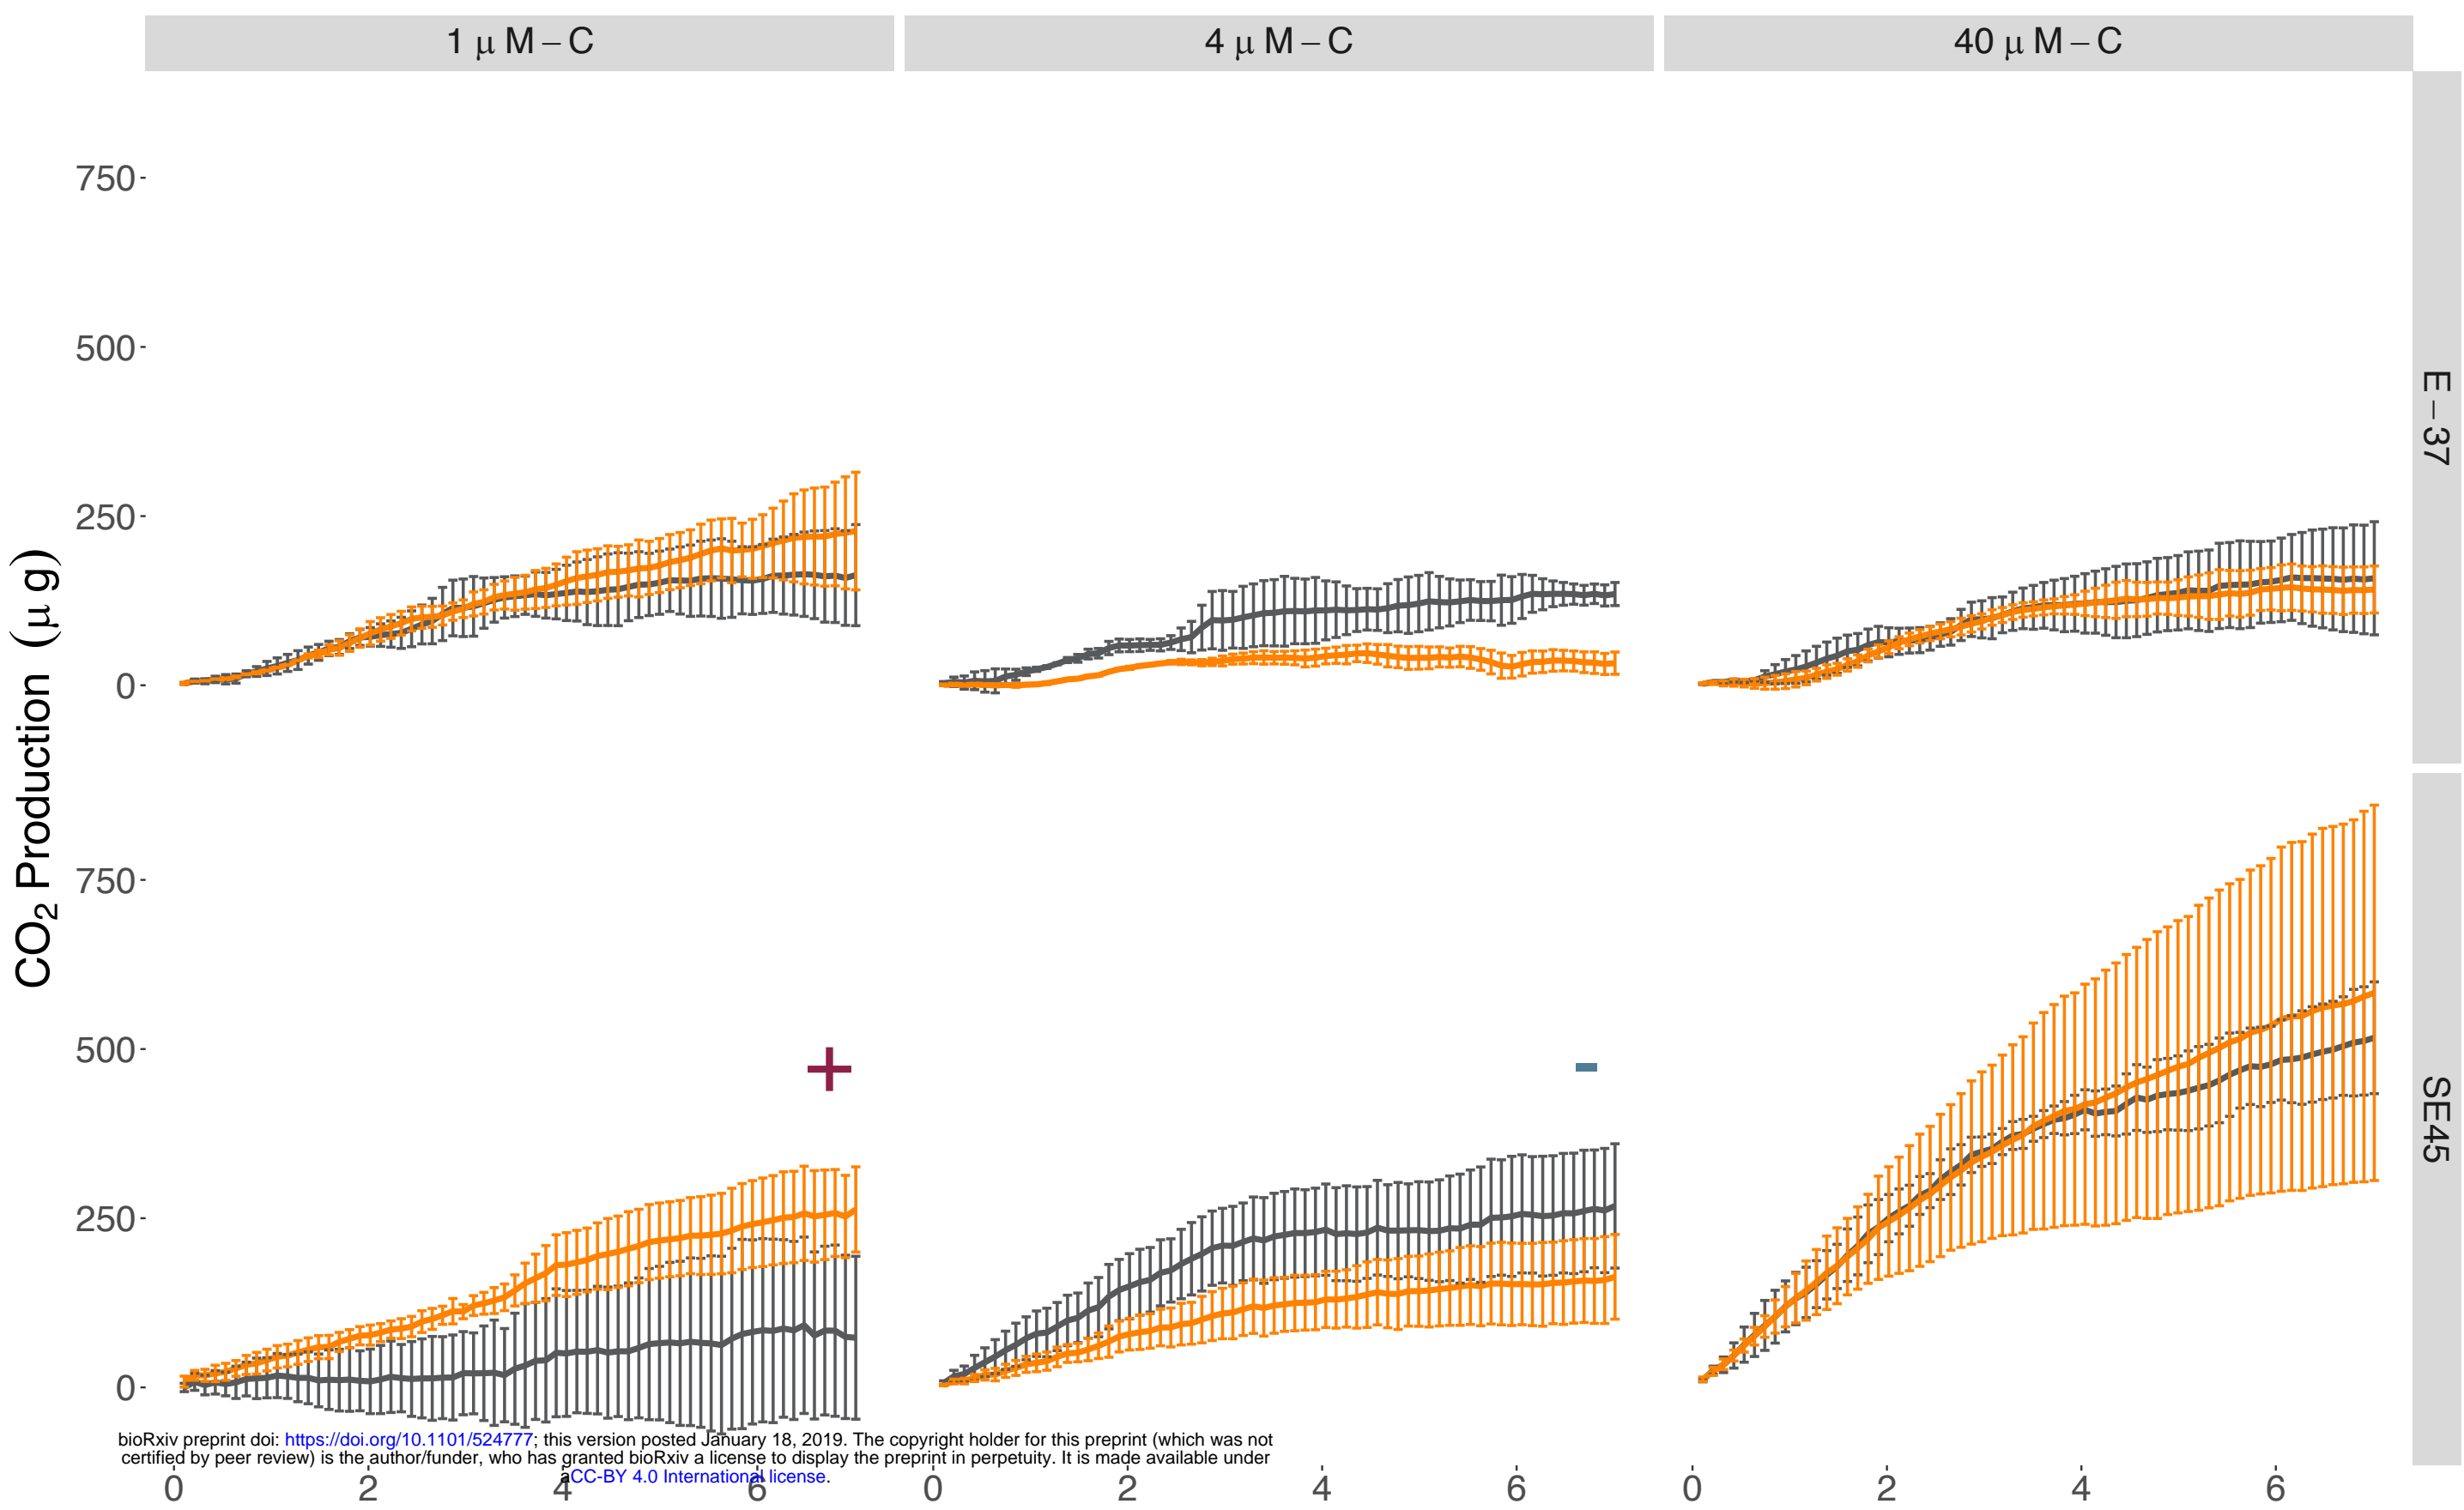

B. High Concentration (400 μM-C)

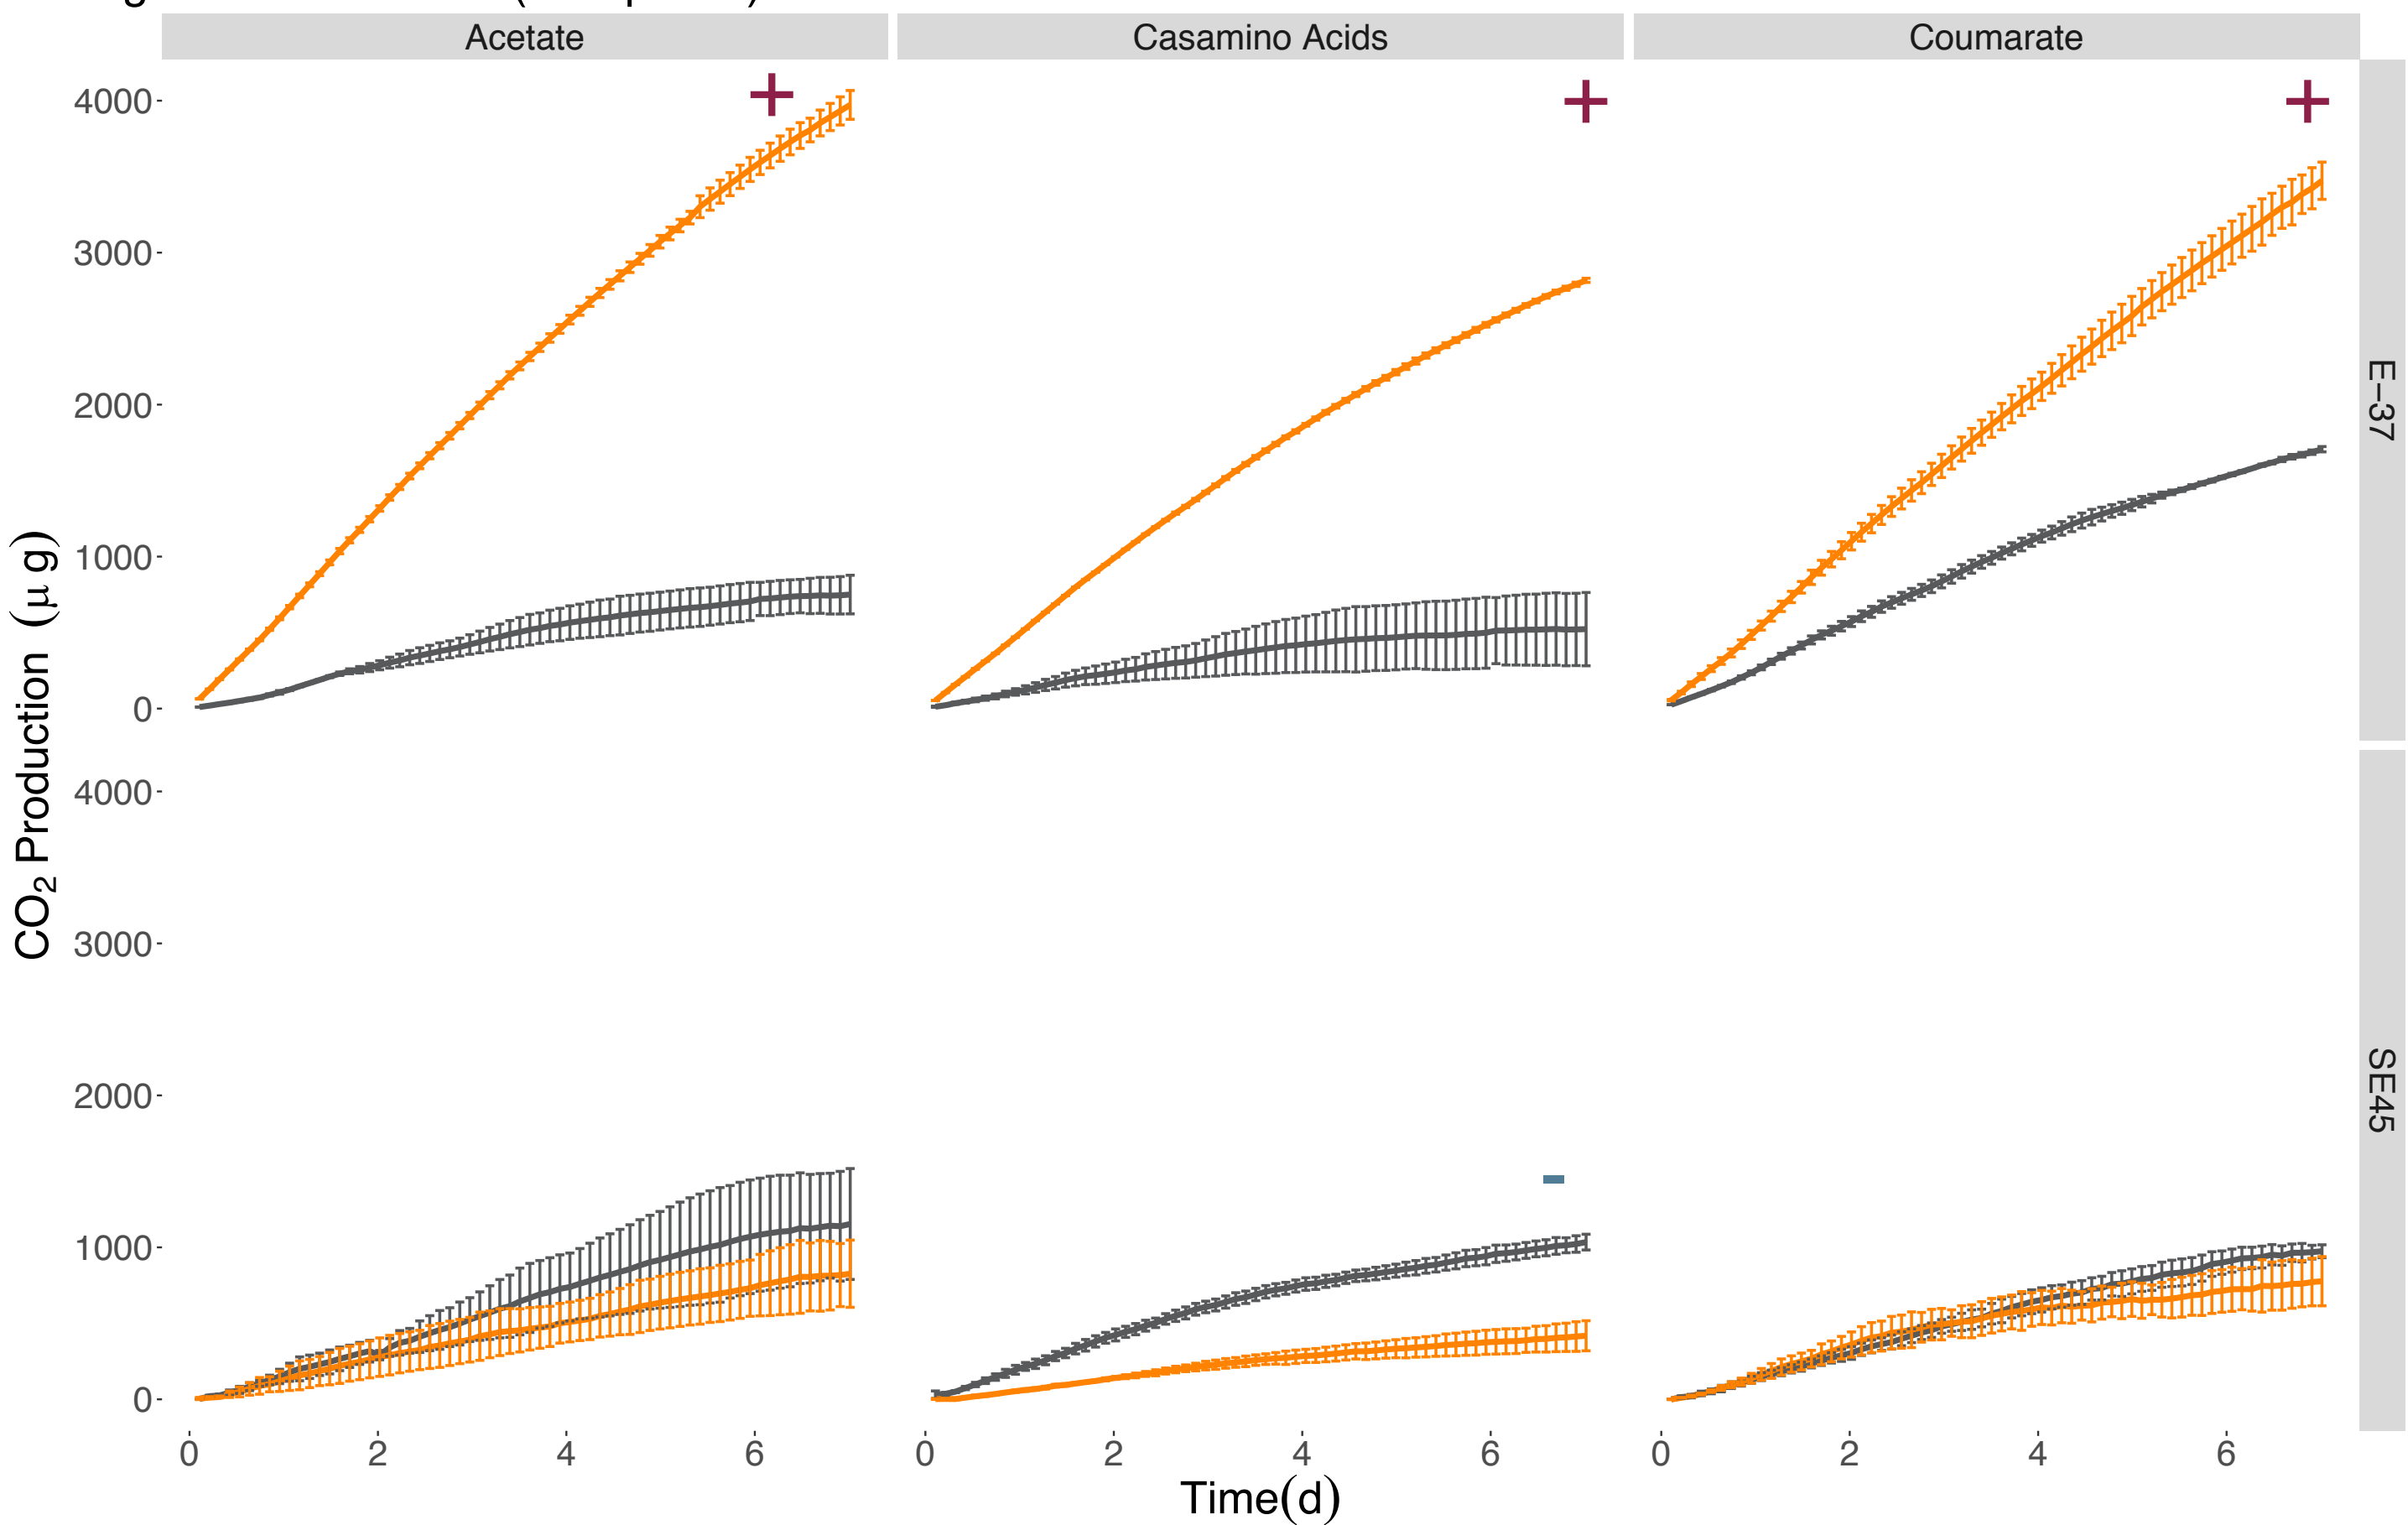

Strain E-37 EE-36 ISM NAS-14.1 SE45 Y4I

### A. Acetate

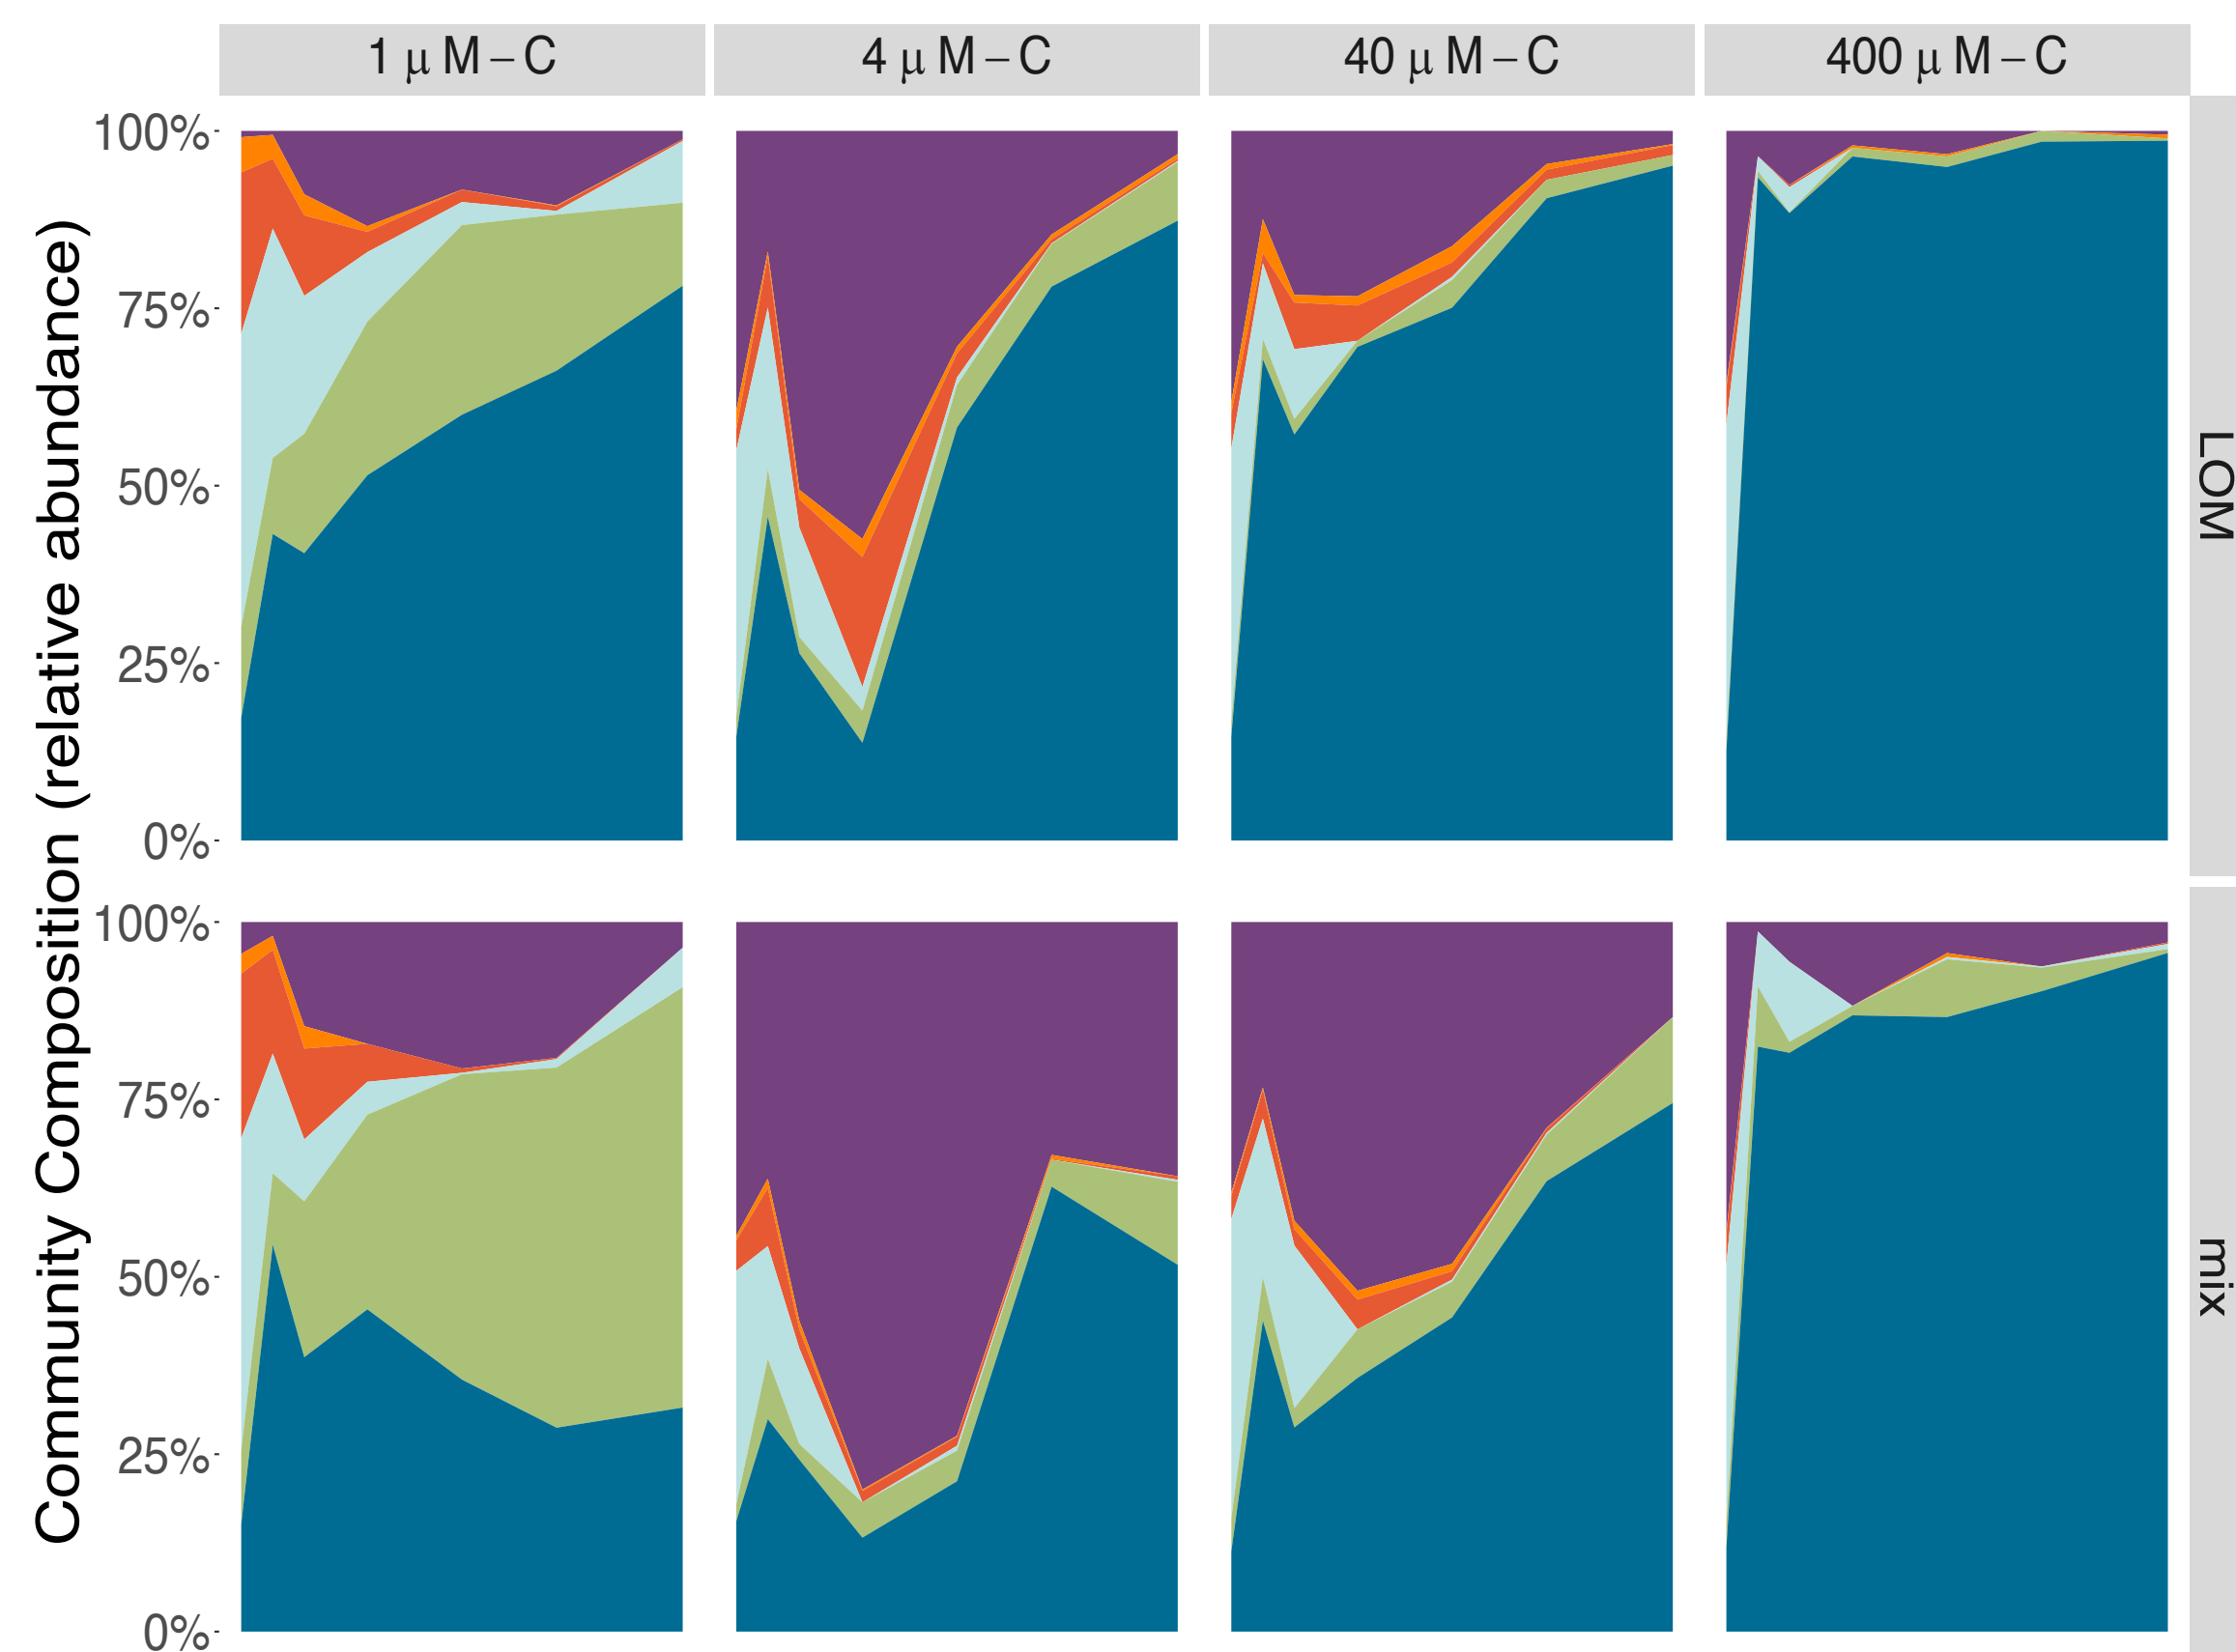

### B. Casamino Acids

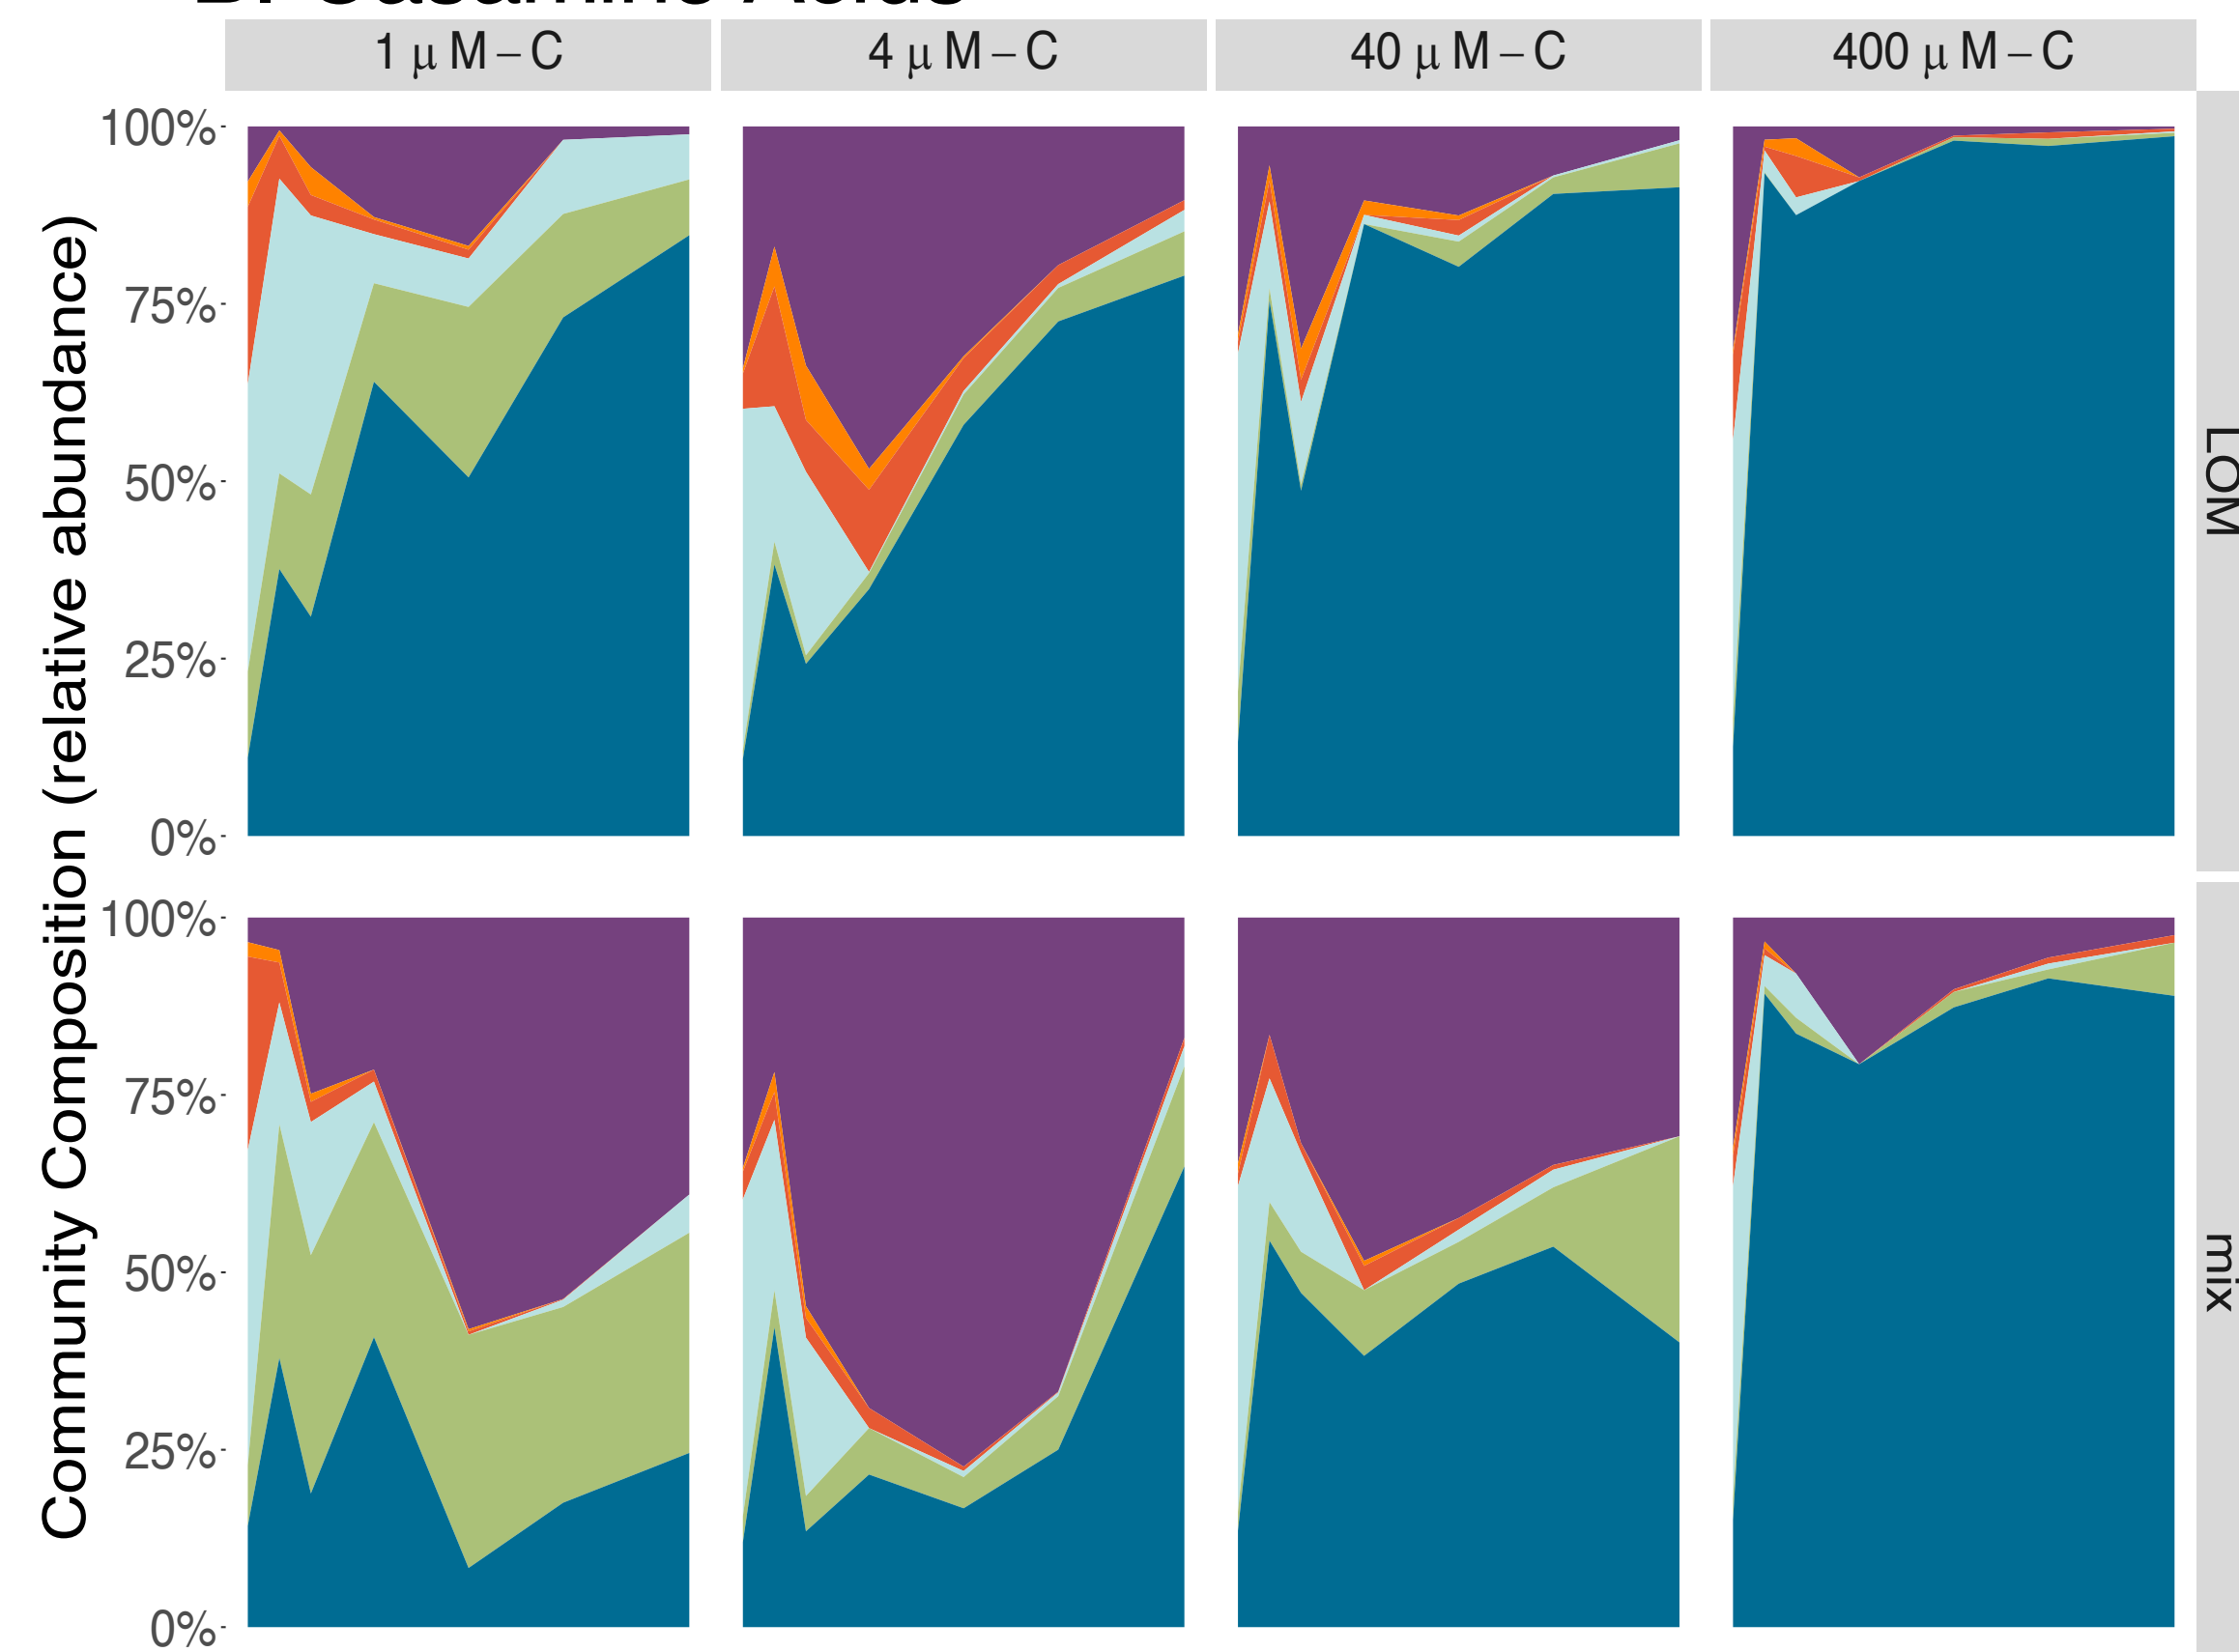

### C. Coumarate

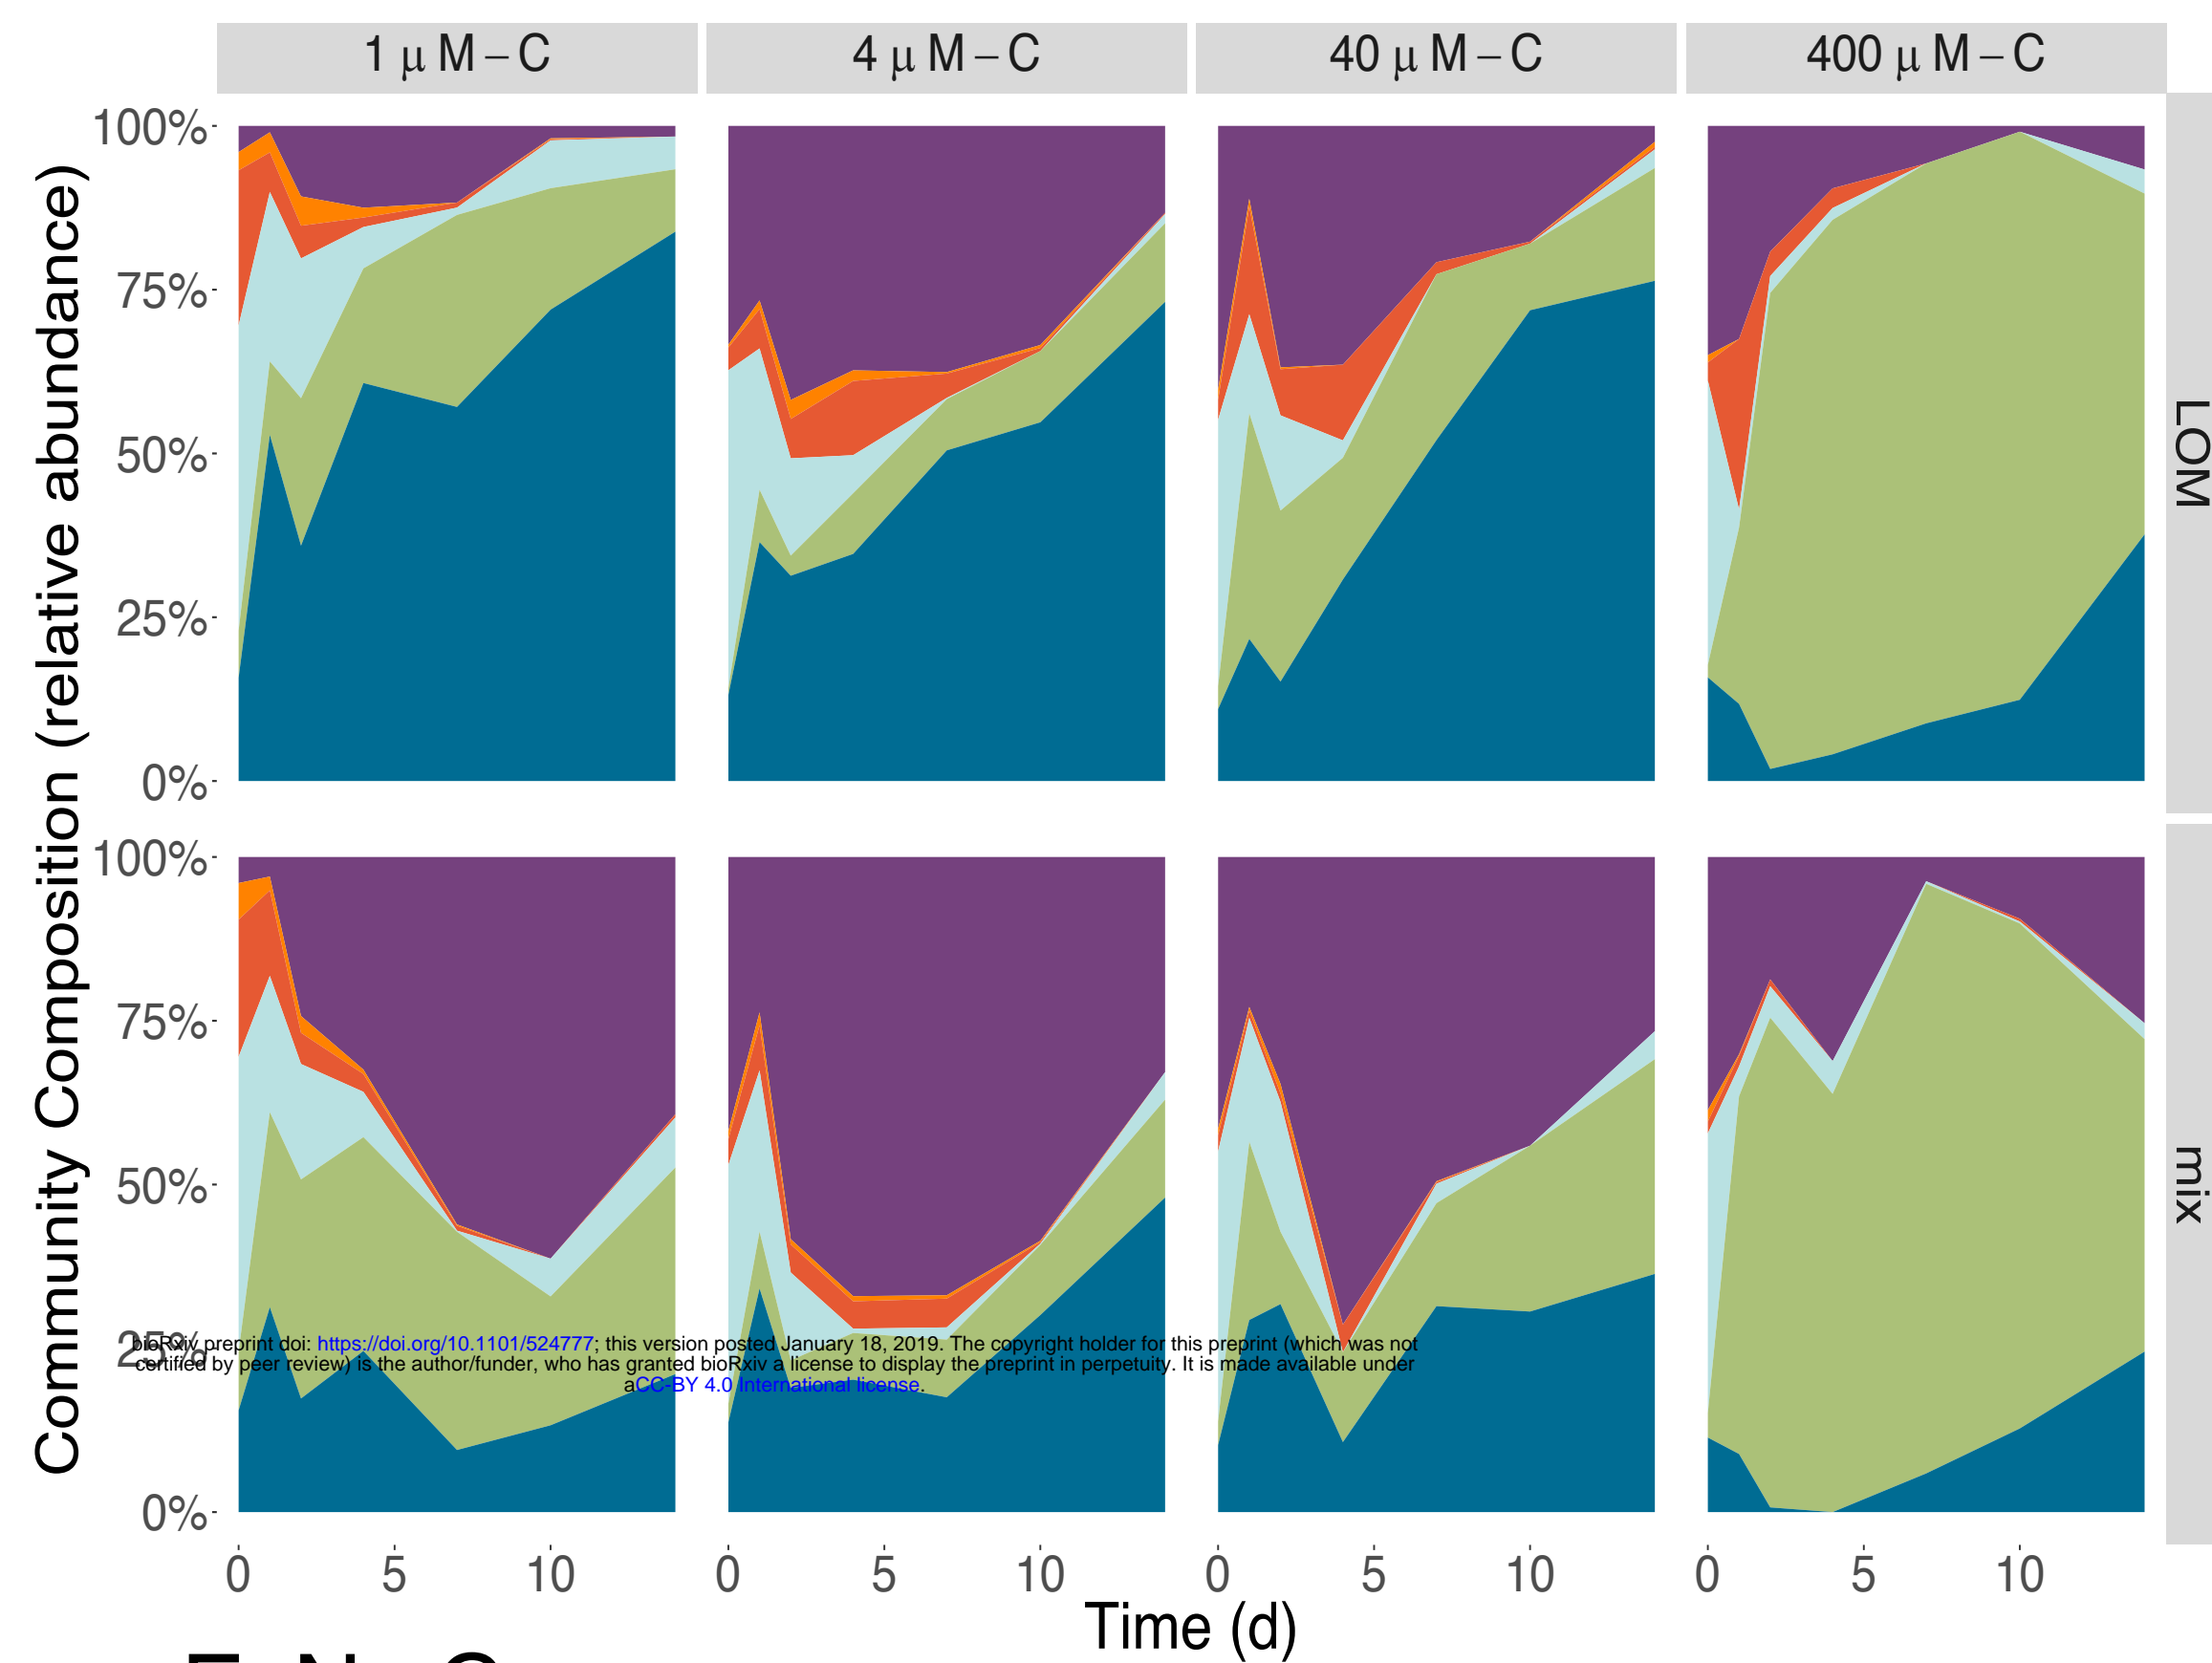

### D. Tryptone

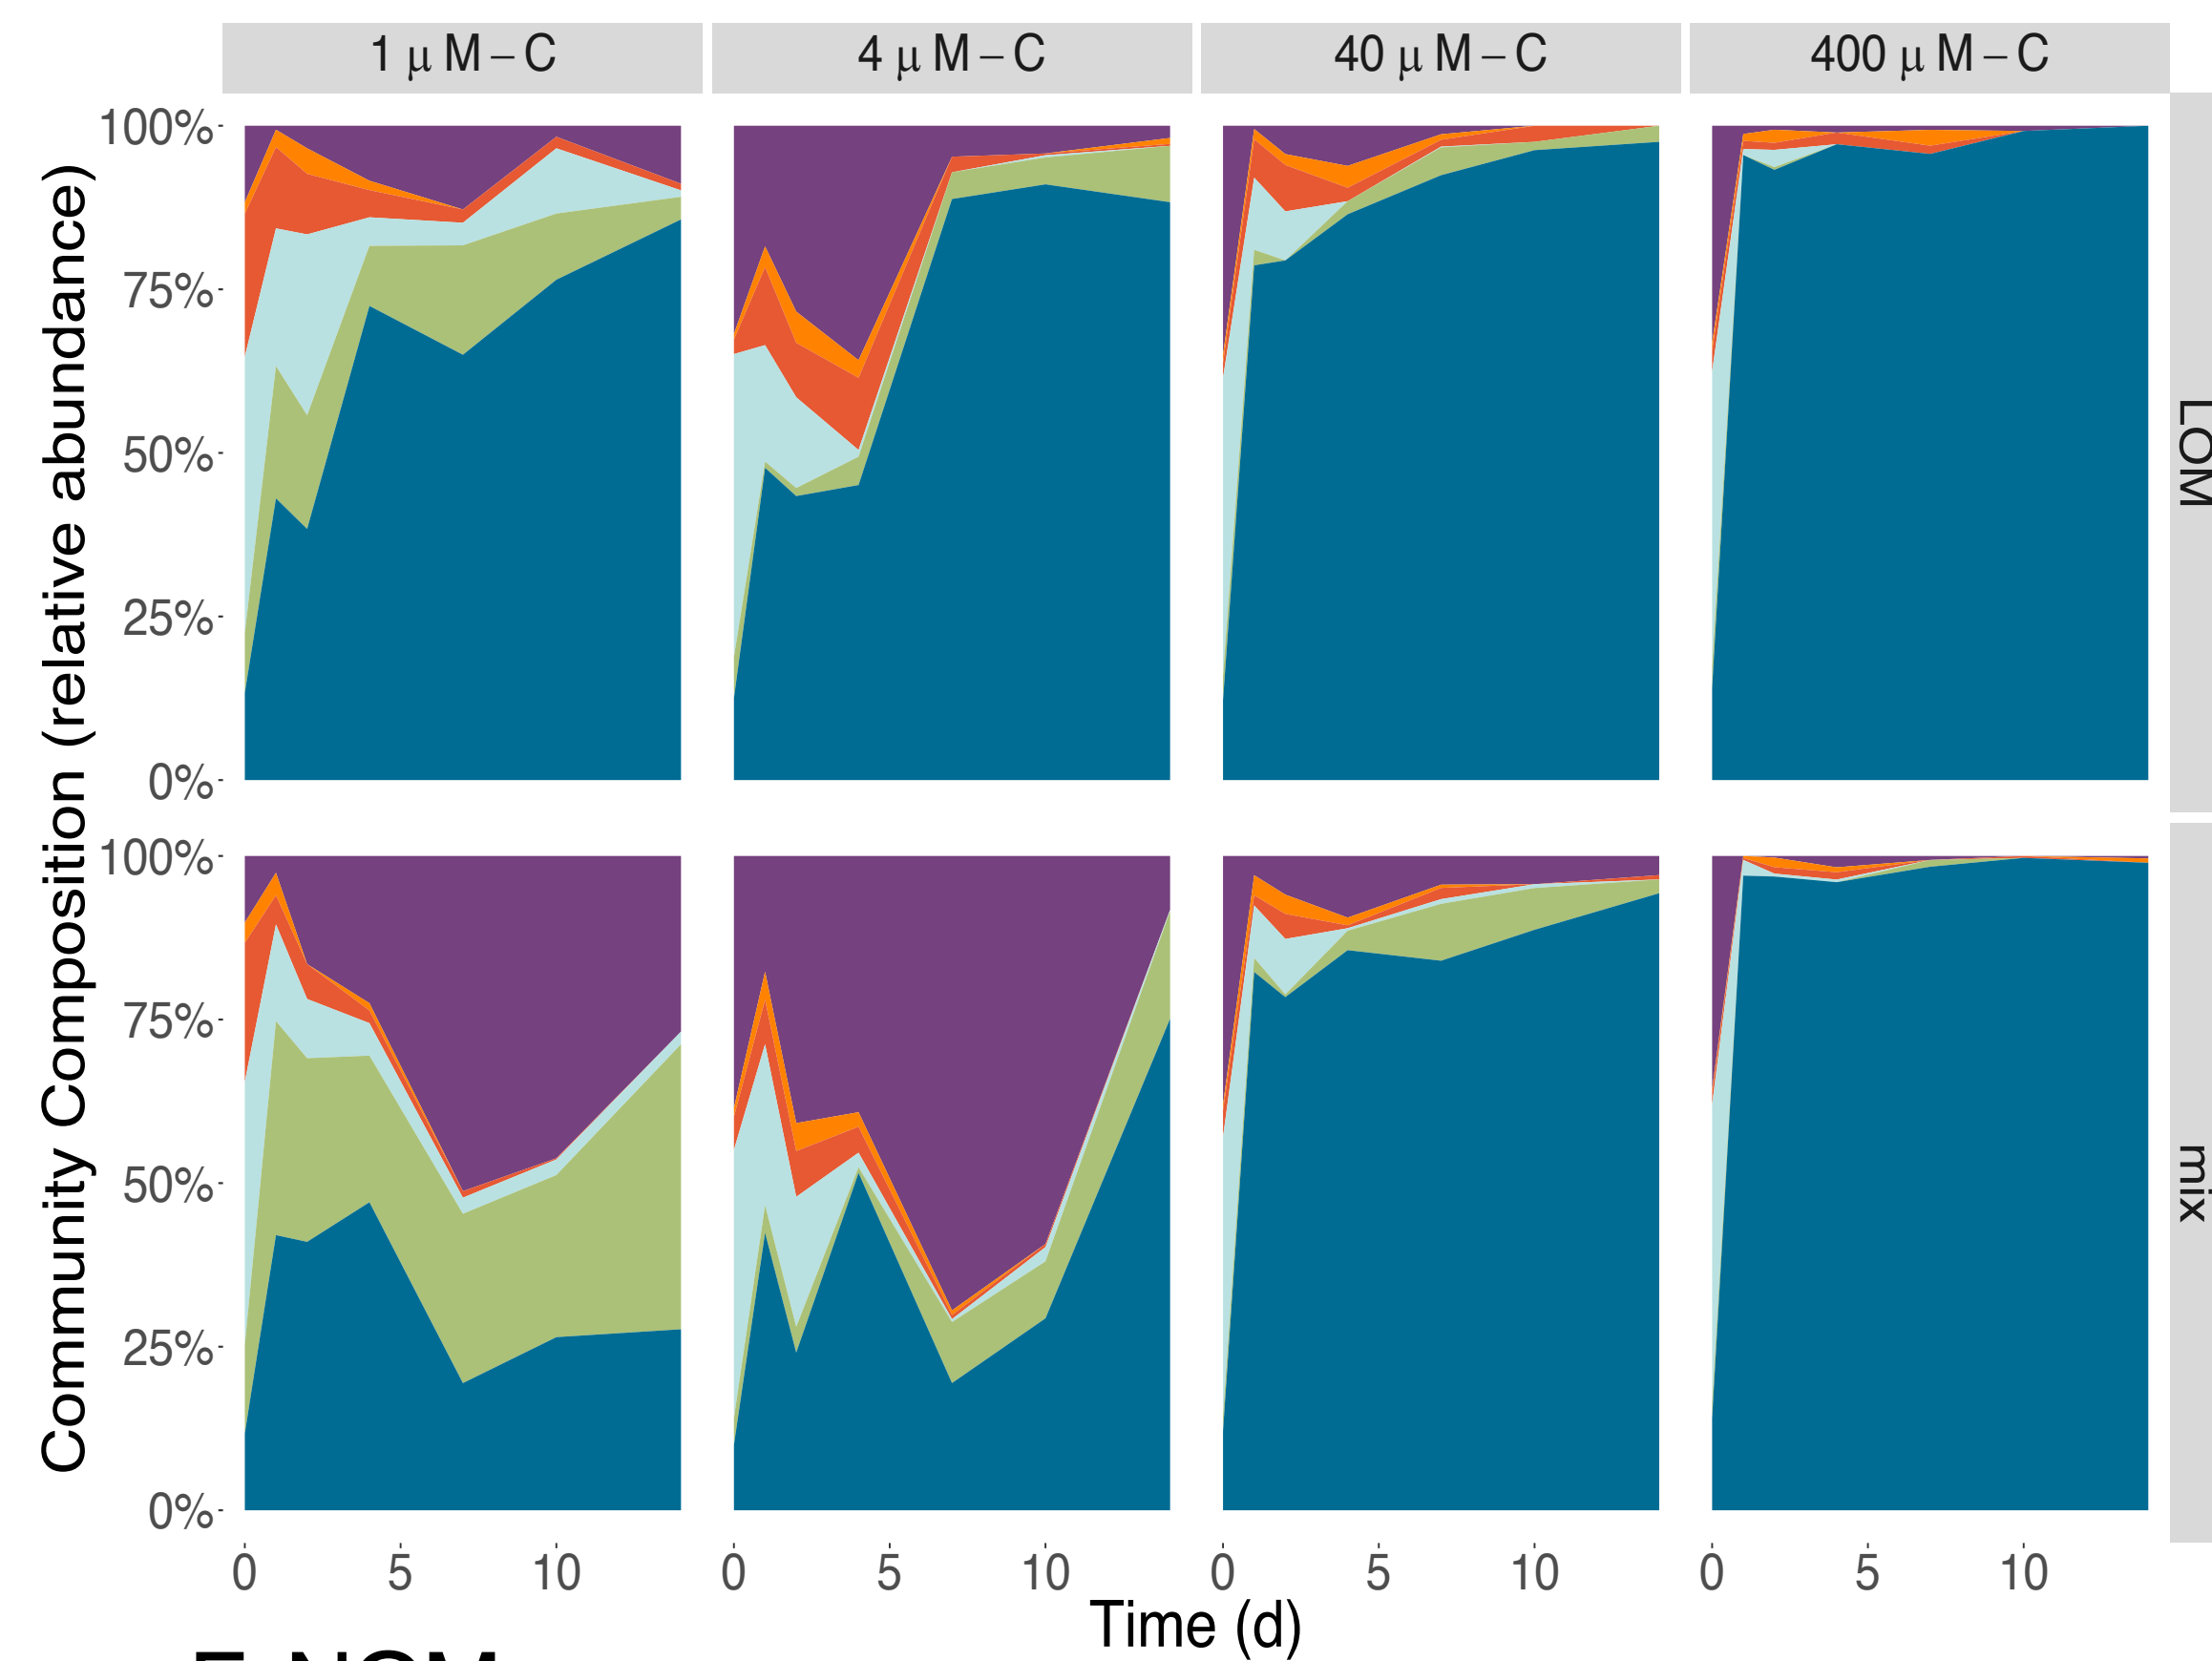

### E. No C

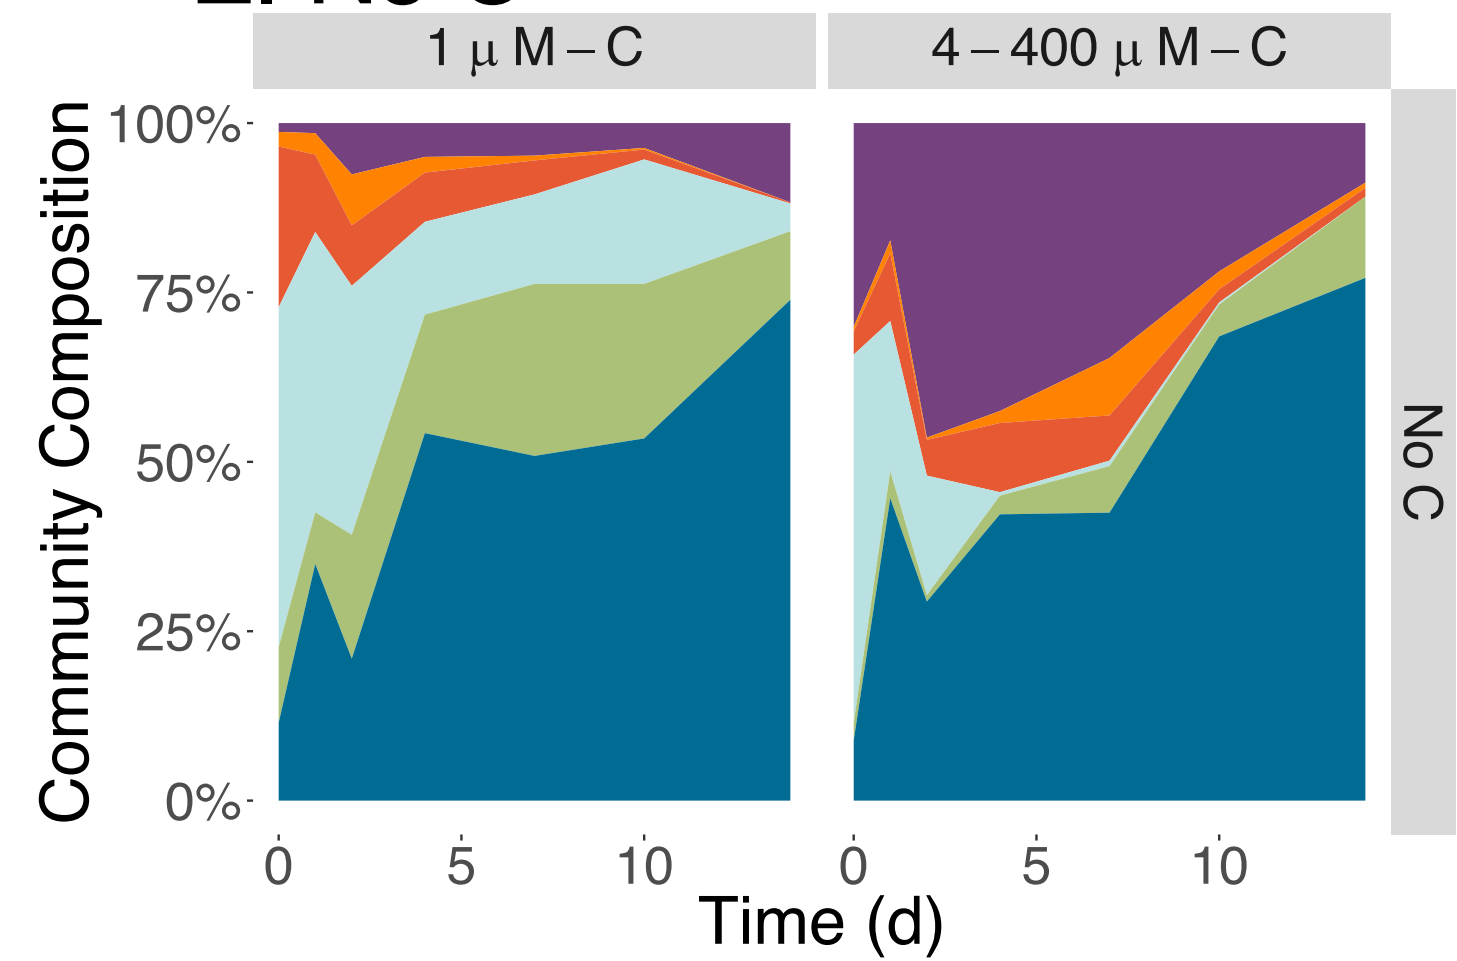

### F. NOM

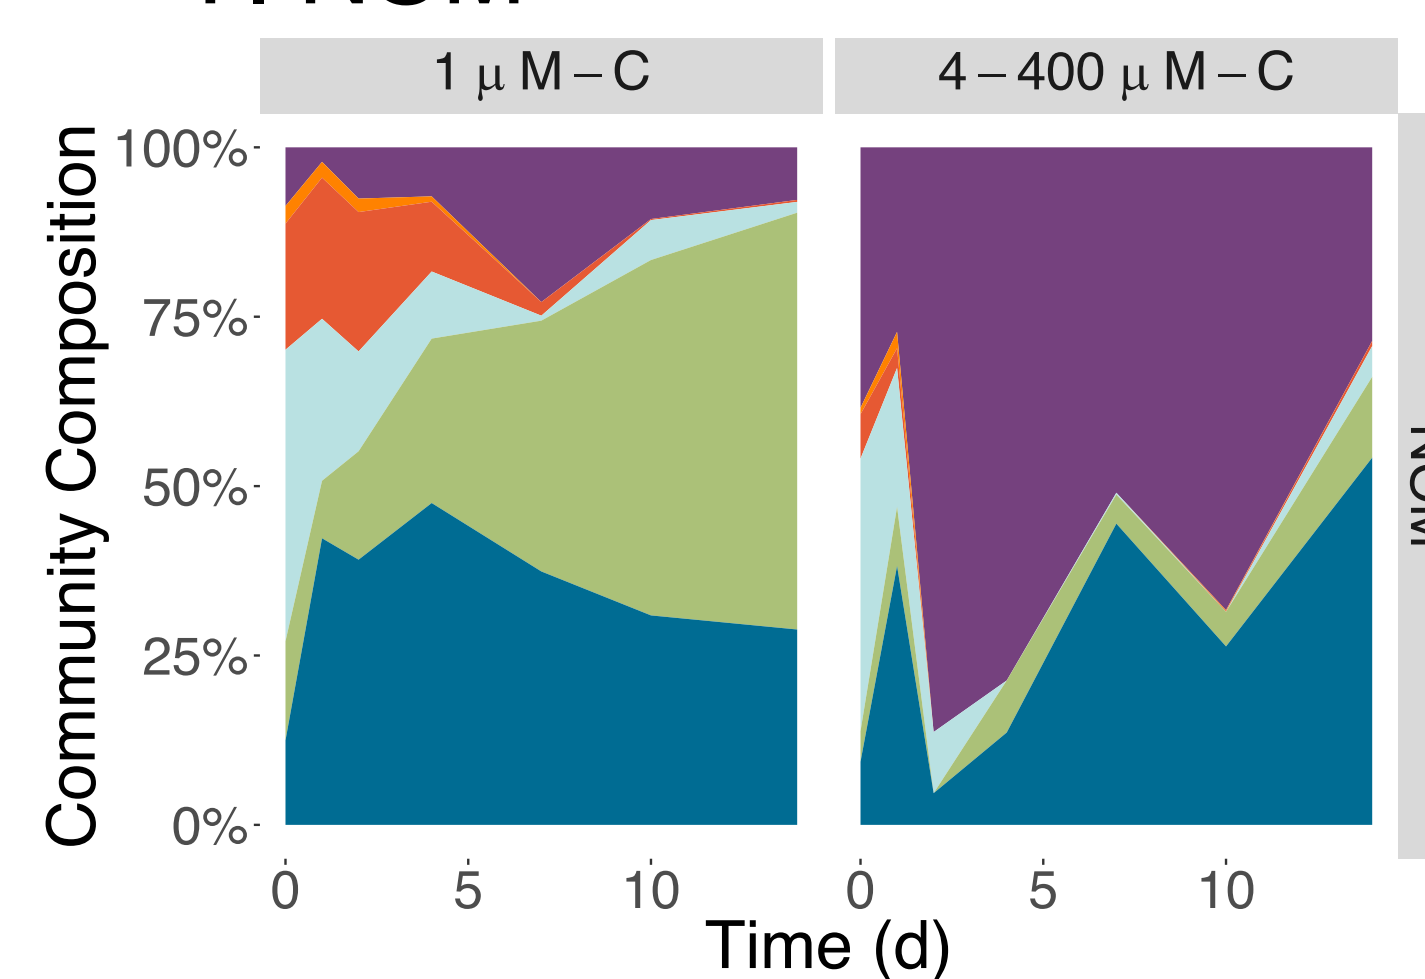

bioRxiv preprint doi: <https://doi.org/10.1101/524777>; this version posted January 18, 2019. The copyright holder for this preprint (which was not certified by peer review) is the author/funder, who has granted bioRxiv a license to display the preprint in perpetuity. It is made available under aCC-BY 4.0 International license.

Treatment — composite — mix

1  $\mu$  M - C

4  $\mu$  M - C

40  $\mu$  M - C

400  $\mu$  M - C

1500

1000

500

0

1500

1000

500

0

1500

1000

500

0

0

2

4

6

0

2

4

6

0

2

4

6

0

2

4

6

Time(d)

bioRxiv preprint doi: <https://doi.org/10.1101/524777>; this version posted January 18, 2019. The copyright holder for this preprint (which was not certified by peer review) is the author/funder, who has granted bioRxiv a license to display the preprint in perpetuity. It is made available under aCC-BY 4.0 International license.

Acetate

Casamino Acids

Coumarate

CO<sub>2</sub> Production ( $\mu$ g)
